# Supplementary material for: ATG101 Degradation by HUWE1-Mediated Ubiquitination Impairs Autophagy and Reduces Survival in Cancer Cells
Source: MDPI journal article supplement (doi:10.3390/ijms22179182), 2021-08-25
Supplement: s1 [file s1]

Supplementary Table S1

| Accession | Description                                                | Sum PEP score | # peptides | Gene symbol |
|-----------|------------------------------------------------------------|---------------|------------|-------------|
| Q7Z6Z7    | E3 ubiquitin-protein ligase HUWE1<br>[OS=Homo sapiens]     | 103.354       | 26         | HUWE1       |
| Q9UNE7-1  | E3 ubiquitin-protein ligase CHIP<br>[OS=Homo sapiens]      | 28.945        | 7          | STUB1       |
| O75150    | E3 ubiquitin-protein ligase BRE1B<br>[OS=Homo sapiens]     | 15.948        | 7          | RNF40       |
| O15344-1  | E3 ubiquitin-protein ligase Midline-1<br>[OS=Homo sapiens] | 4.944         | 2          | MID1        |

(Table S1)
