# Supplementary material for: ATG101 Degradation by HUWE1-Mediated Ubiquitination Impairs Autophagy and Reduces Survival in Cancer Cells
Source: Int J Mol Sci. 2021 Aug 25;22(17):9182. doi: 10.3390/ijms22179182 (PMC8430637; doi:10.3390/ijms22179182)
Supplement: Supplementary file 1 [file ijms-22-09182-s001.zip]

Archive with 16 entries (16 files):
- IJMS1299763_Supplementary materials_legend.pdf
- IJMS1299763_Supplementary materials_Revised.pptx
- Supplementary Figure S1.pdf
- Supplementary Figure S1.pptx
- Supplementary Figure S2.pdf
- Supplementary Figure S2.pptx
- Supplementary Figure S3.pdf
- Supplementary Figure S3.pptx
- Supplementary Figure S4.pdf
- Supplementary Figure S4.pptx
- Supplementary Figure S5.pdf
- Supplementary Figure S5.pptx
- Supplementary Figure S6.pdf
- Supplementary Figure S6.pptx
- Supplementary Table S1.pdf
- Supplementary Table S1.pptx
