# Supplementary figures and images for: ATG101 Degradation by HUWE1-Mediated Ubiquitination Impairs Autophagy and Reduces Survival in Cancer Cells
Source: MDPI journal article supplement (doi:10.3390/ijms22179182), 2021-08-25

Supplementary Figure S1

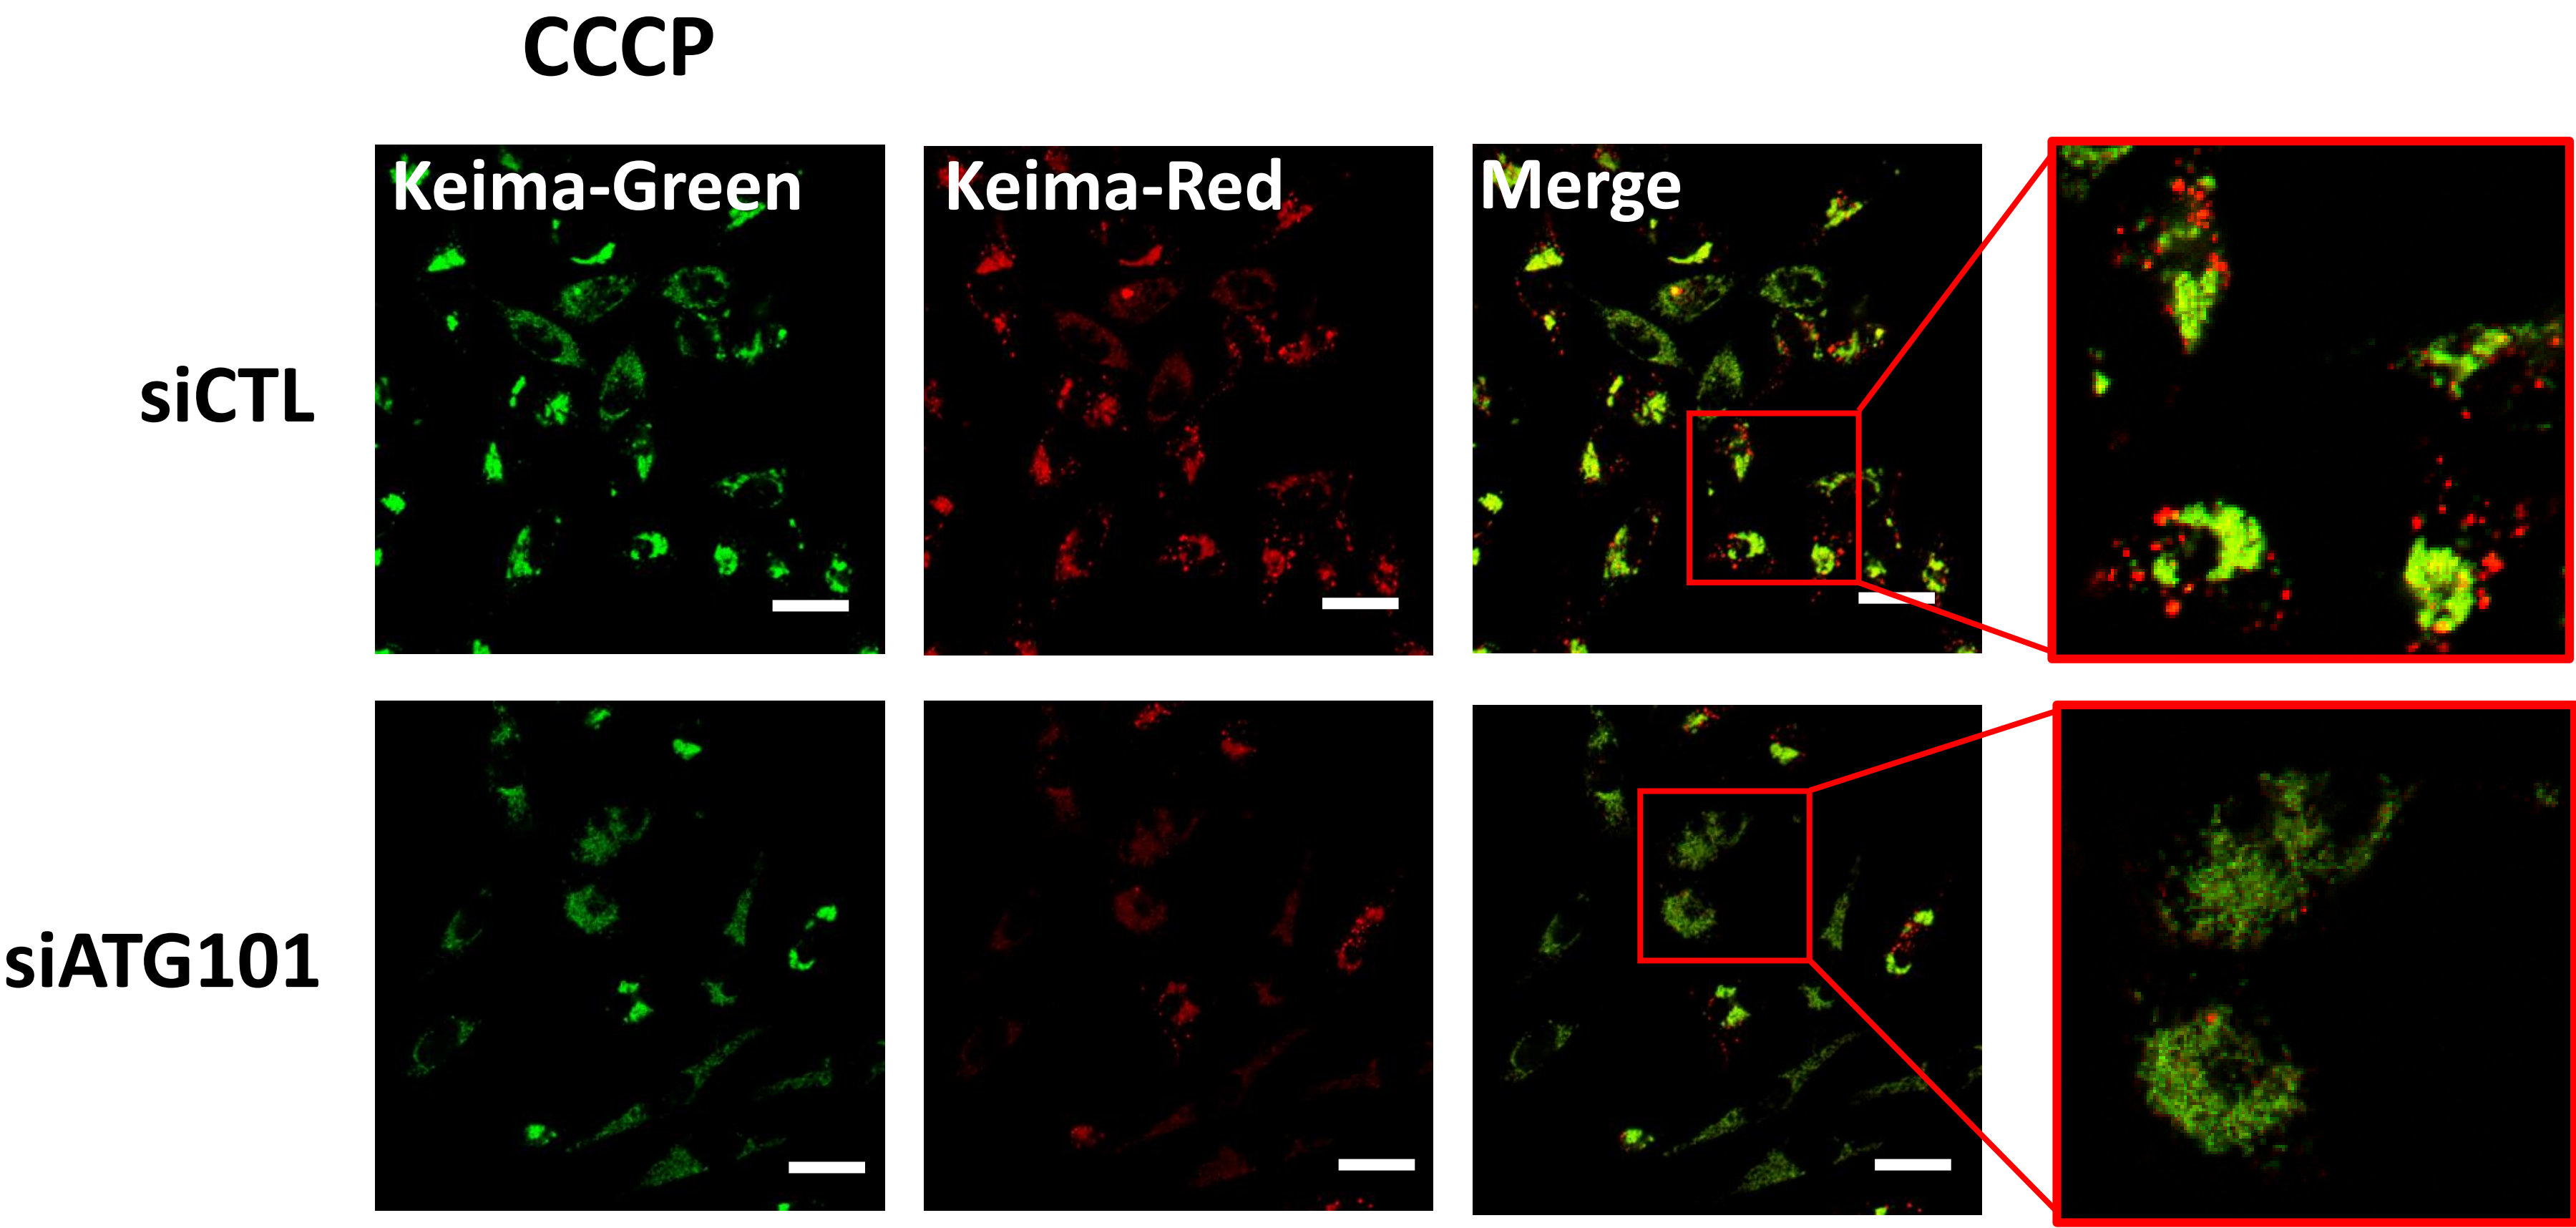

(a)

Supplement: s1 [file s1]

Supplementary Figure S5

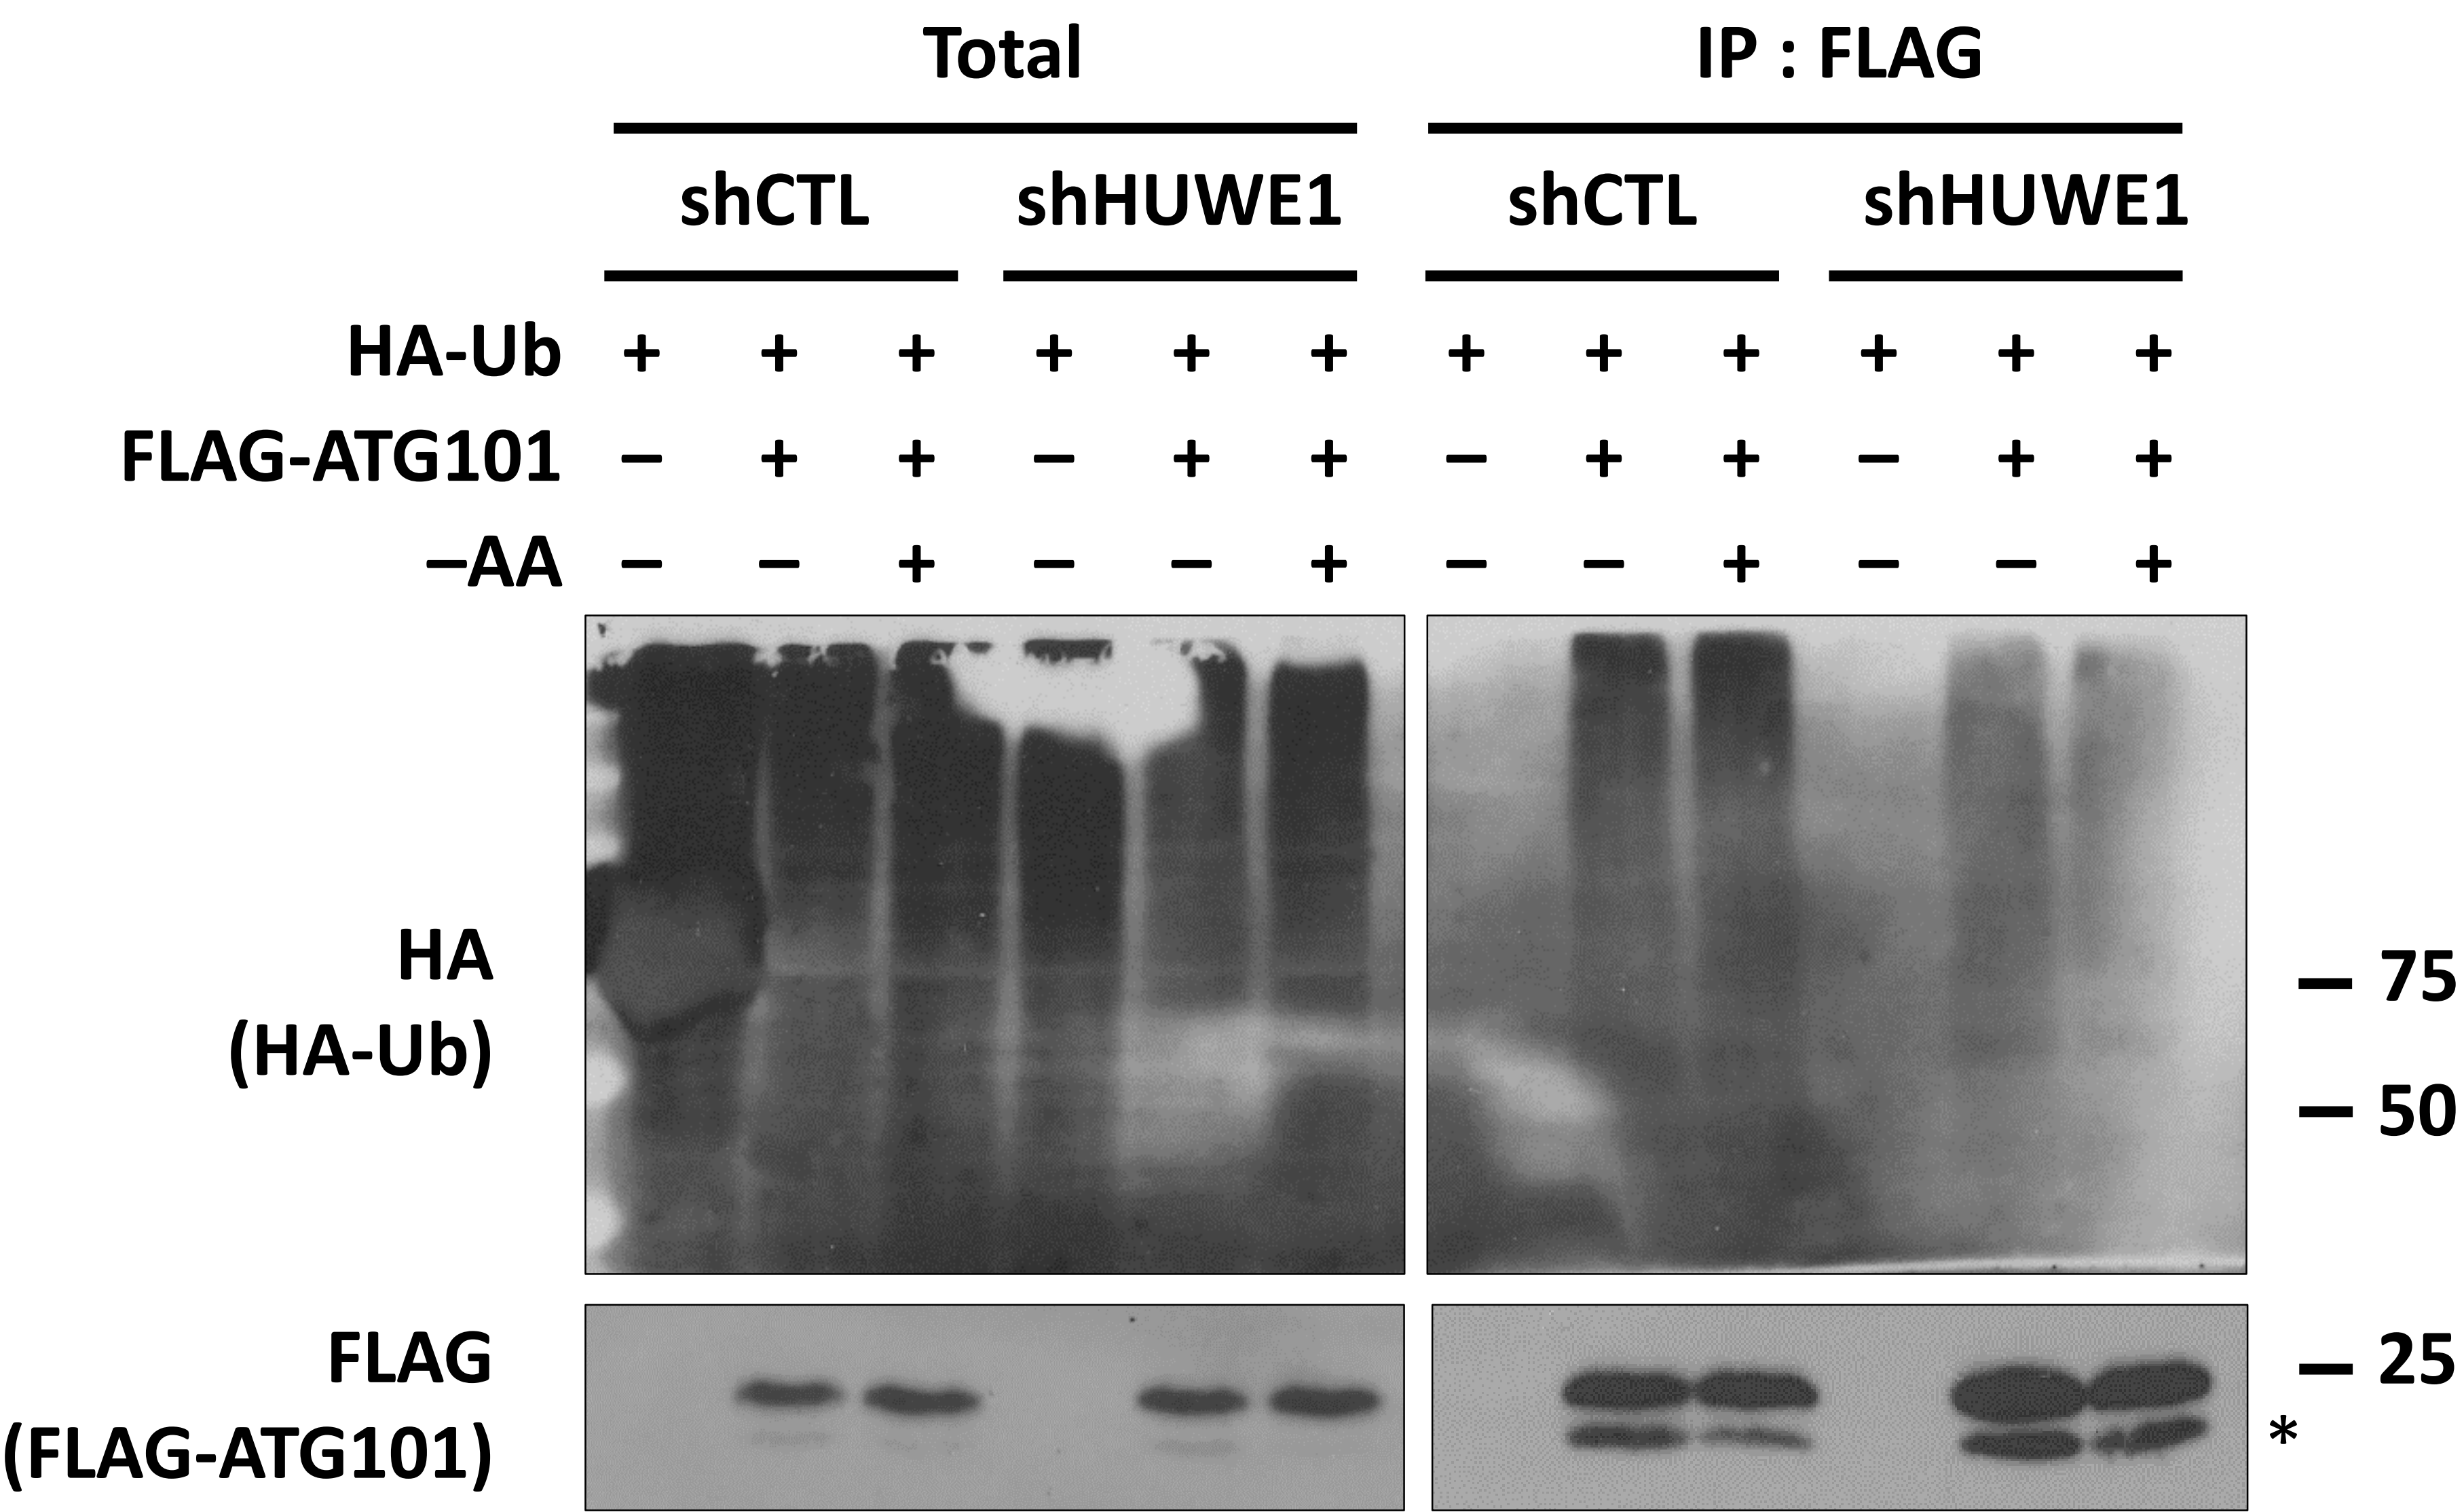

Supplement: s1 [file s1]

Supplementary Figure S4

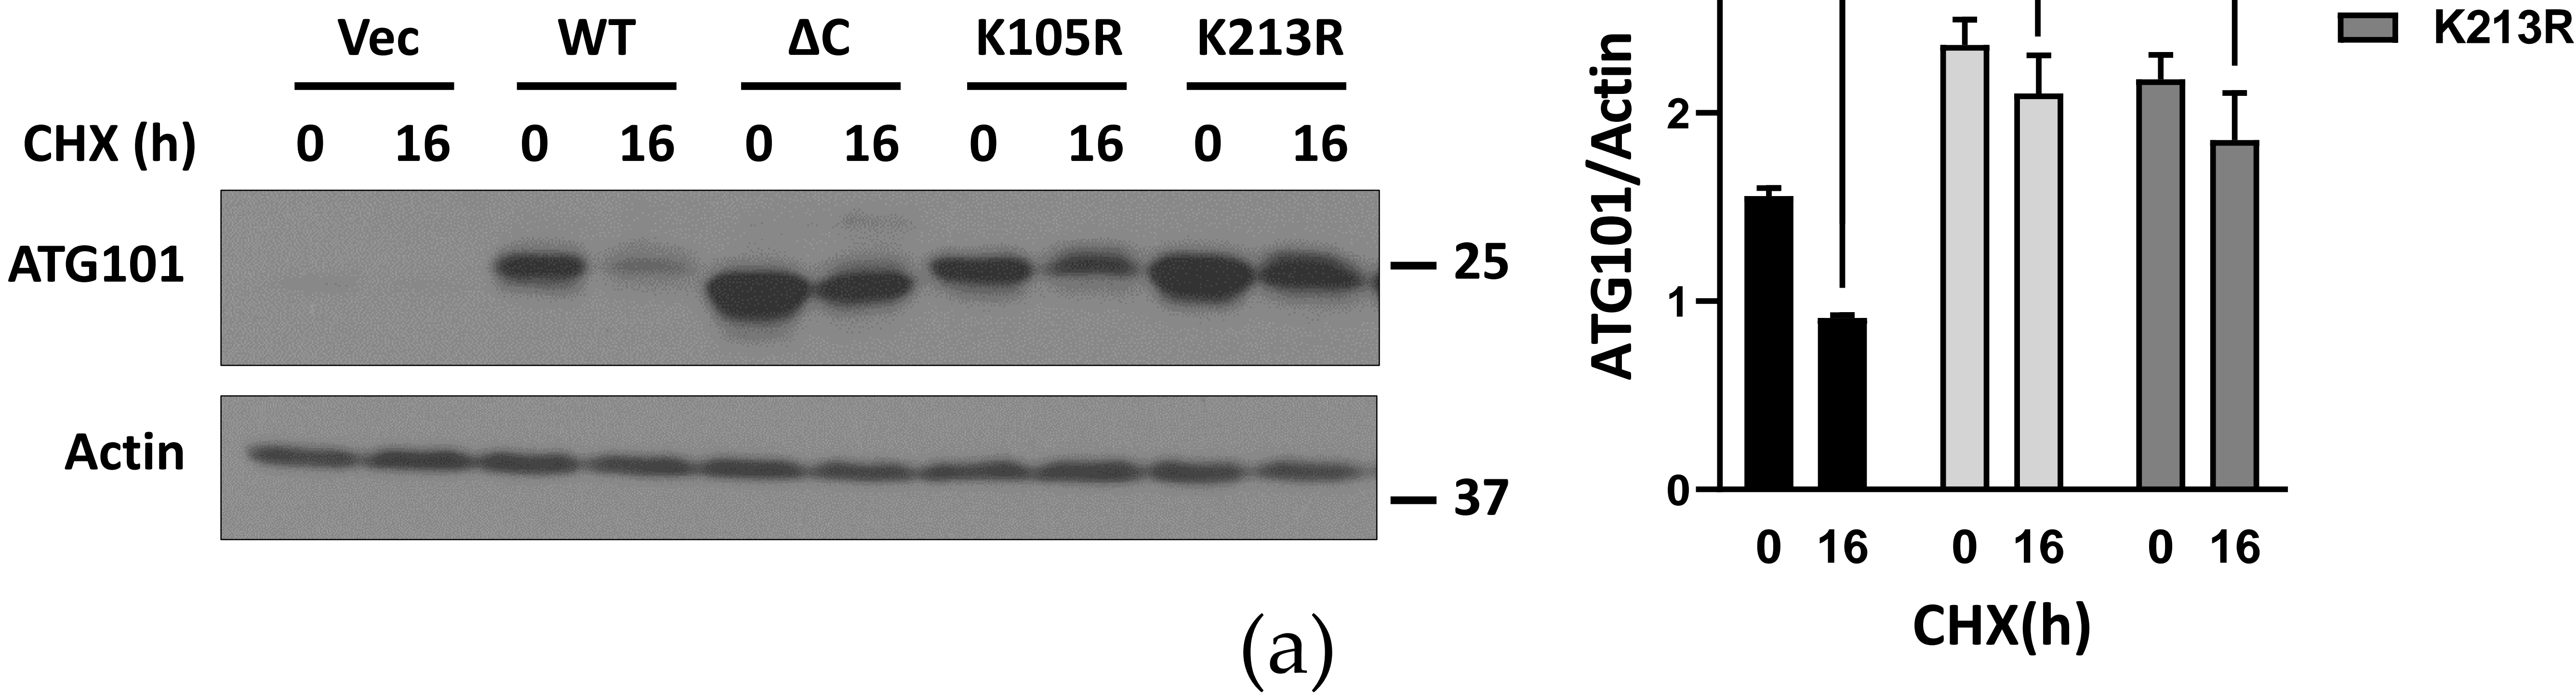

(a)

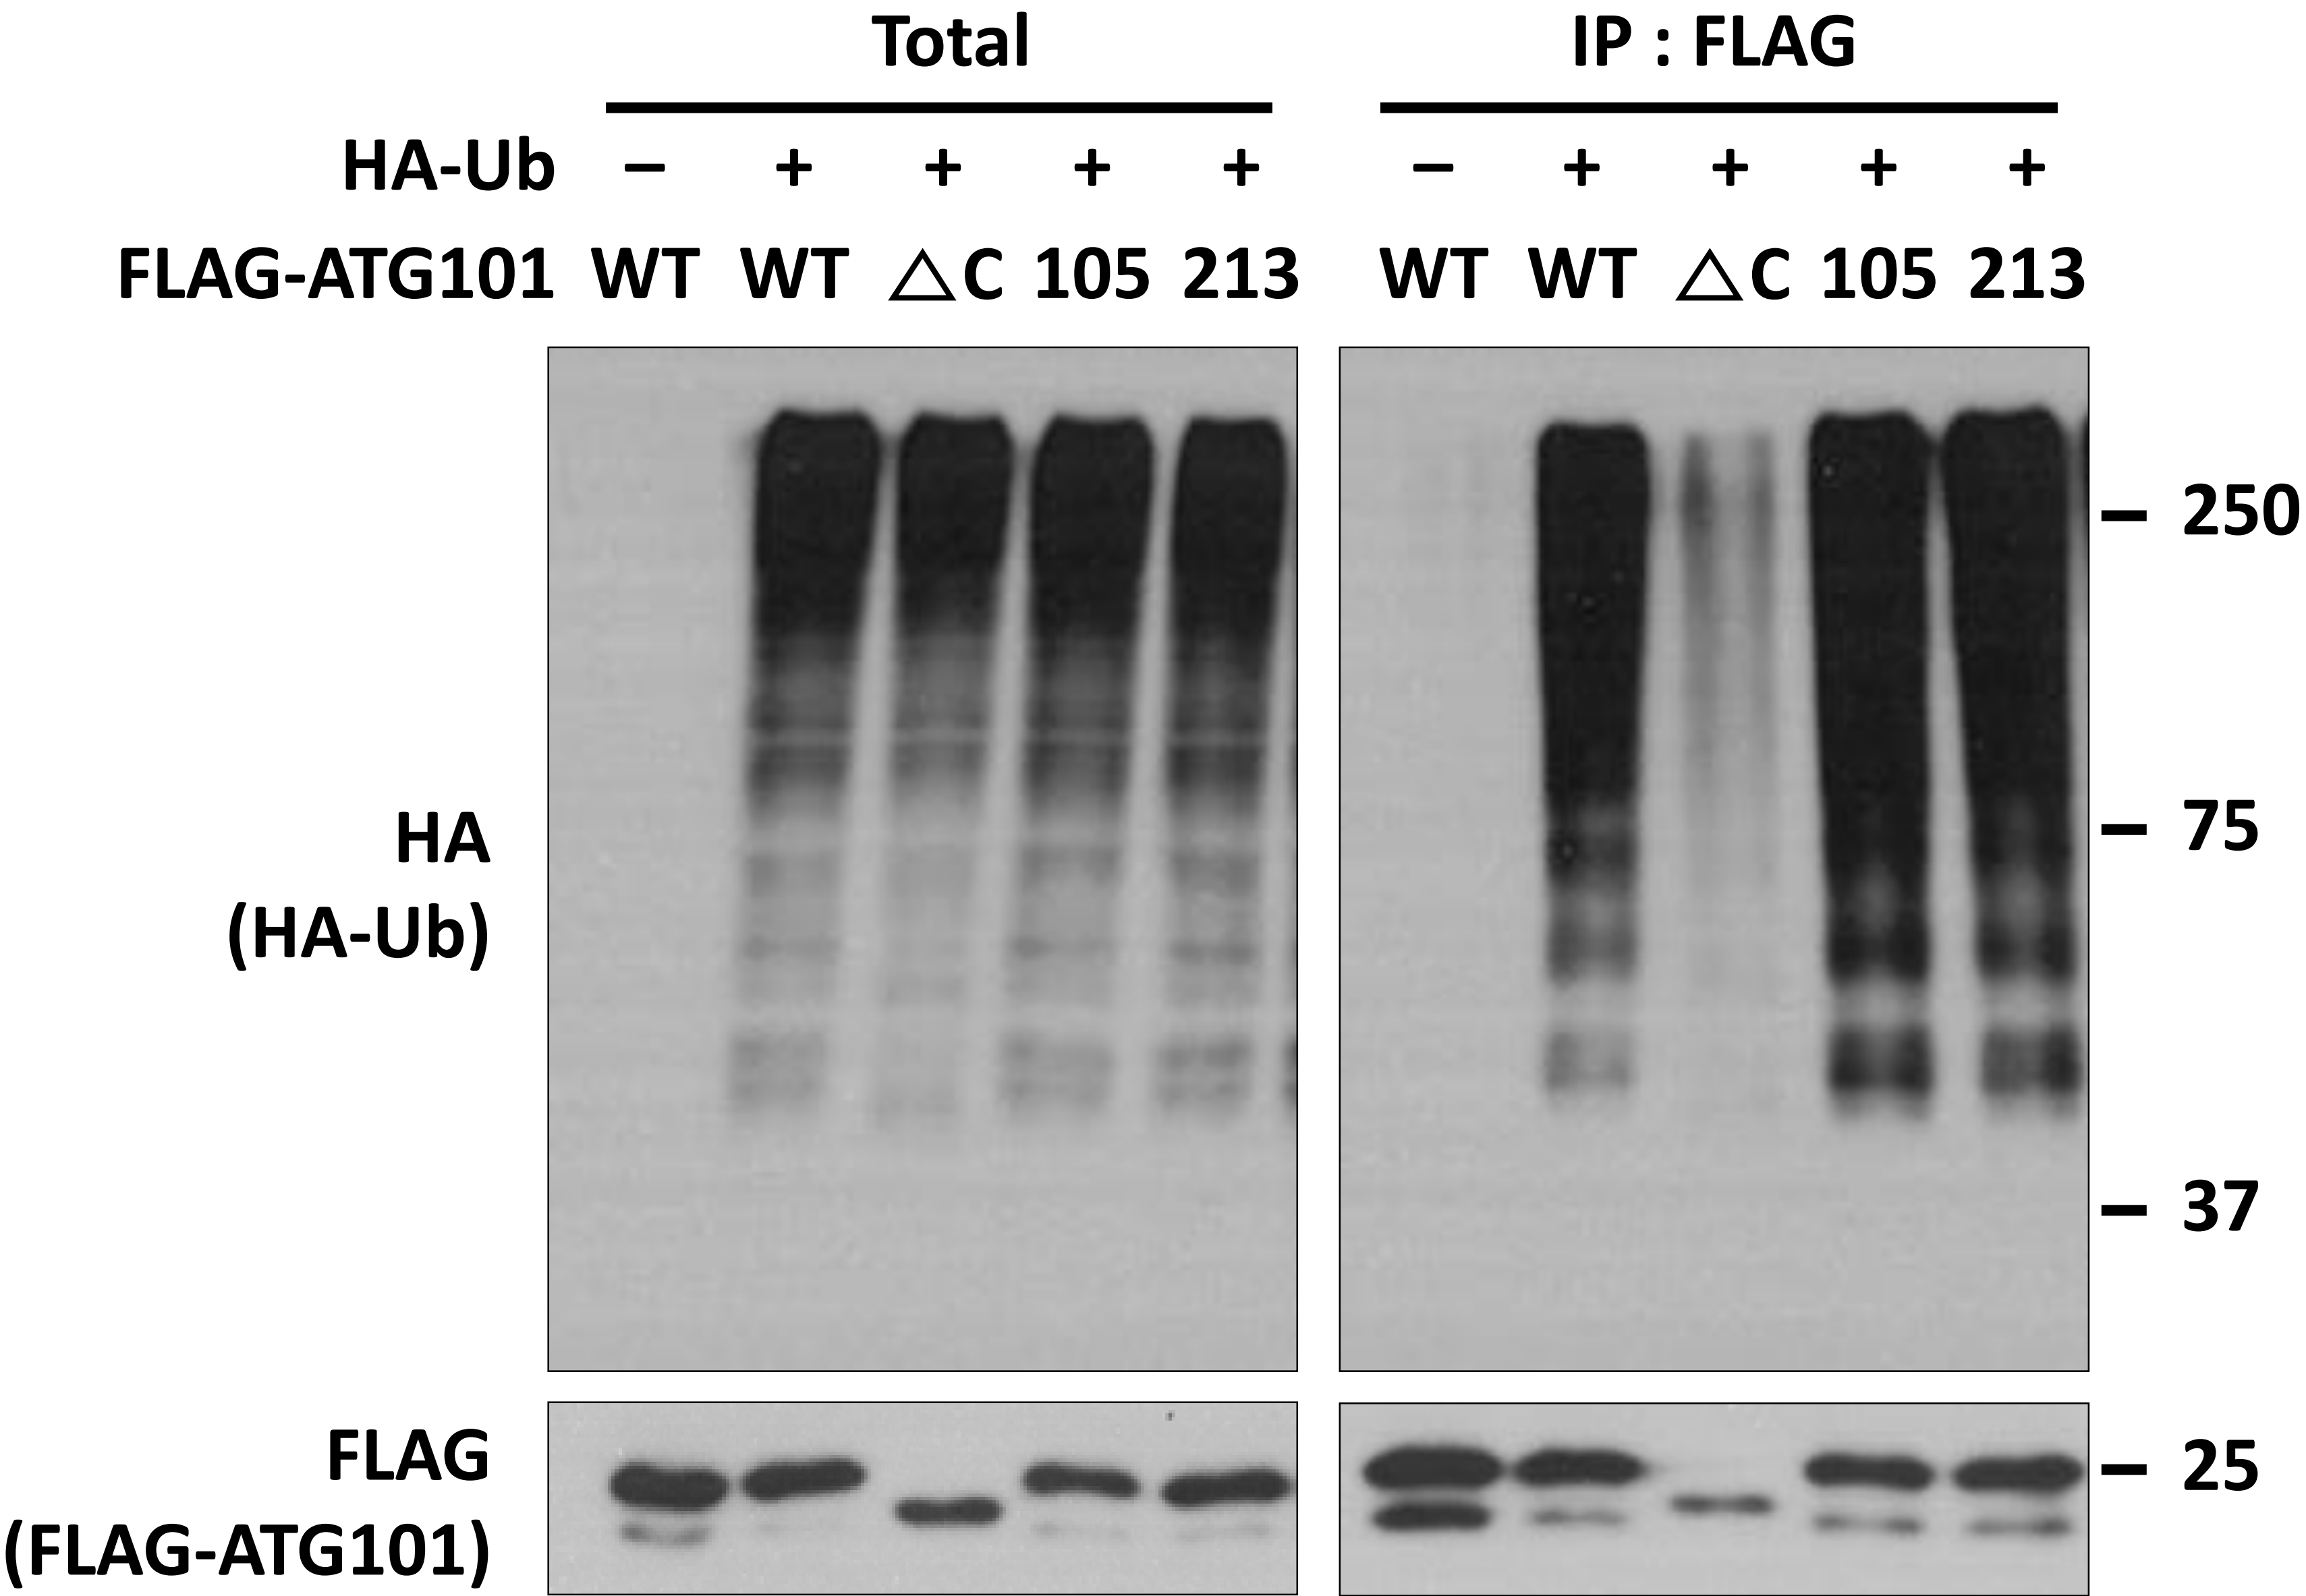

(b)

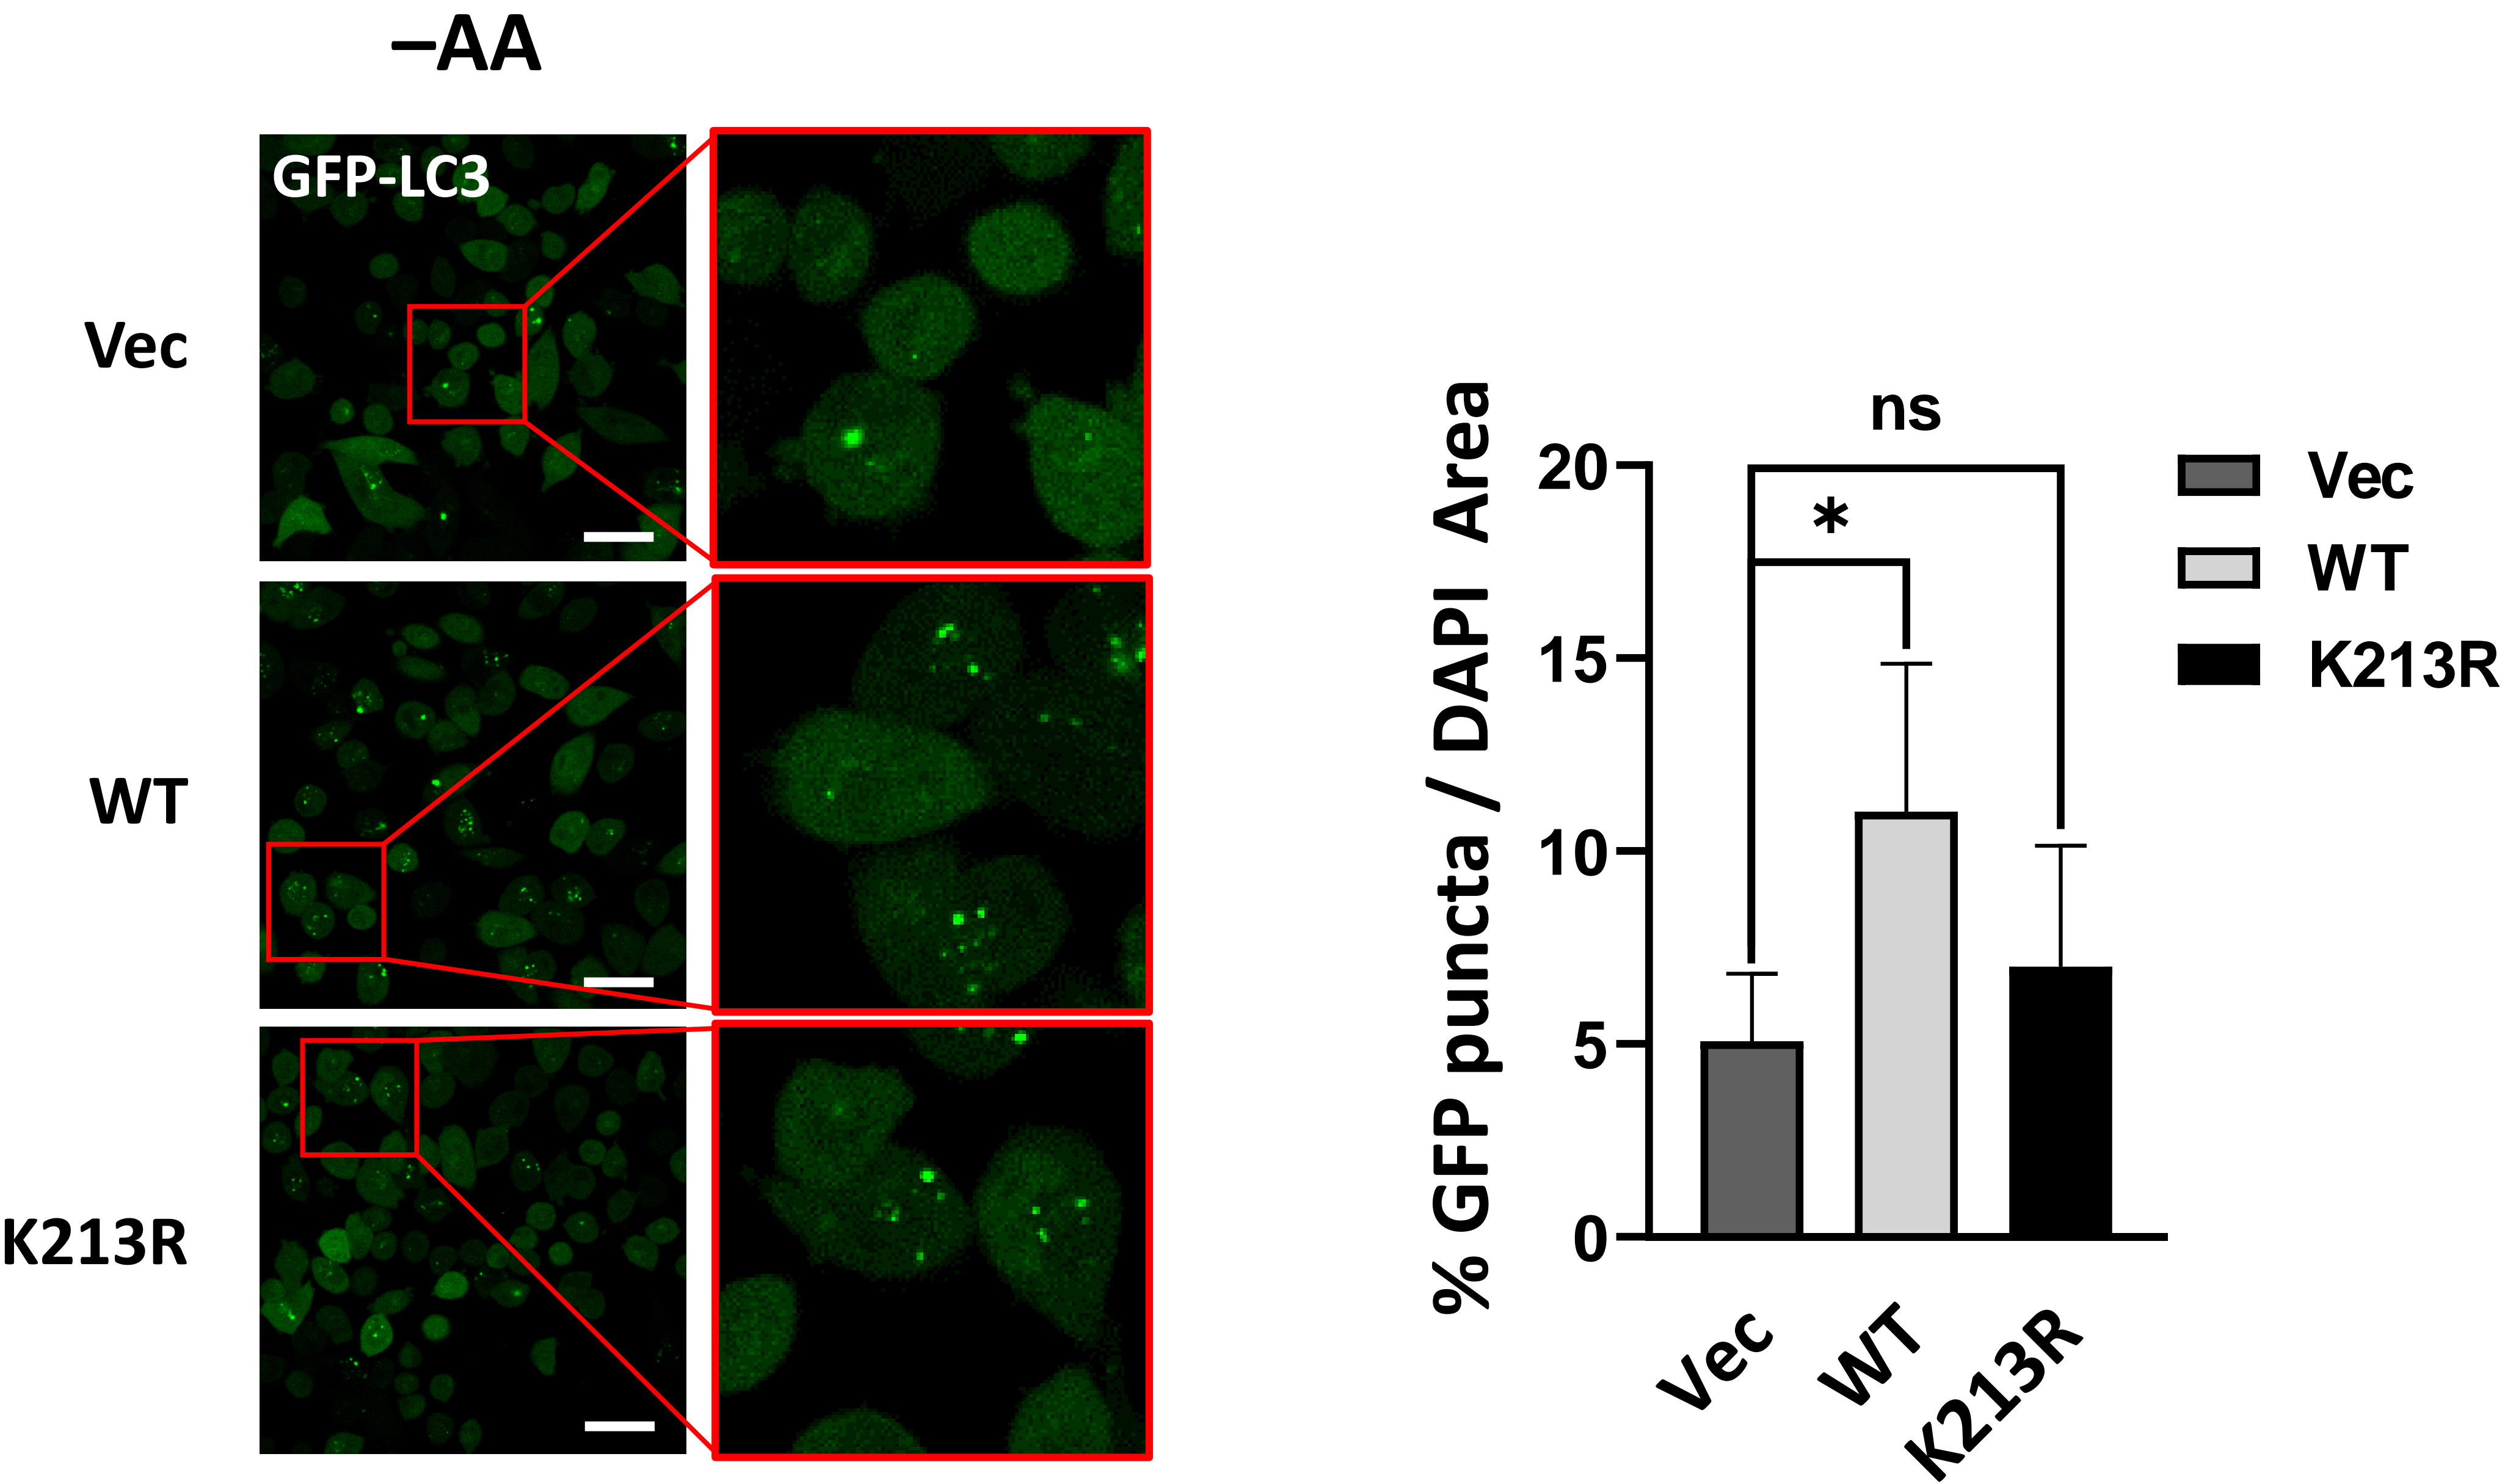

(c)

Supplement: s1 [file s1]

Supplementary Figure S6

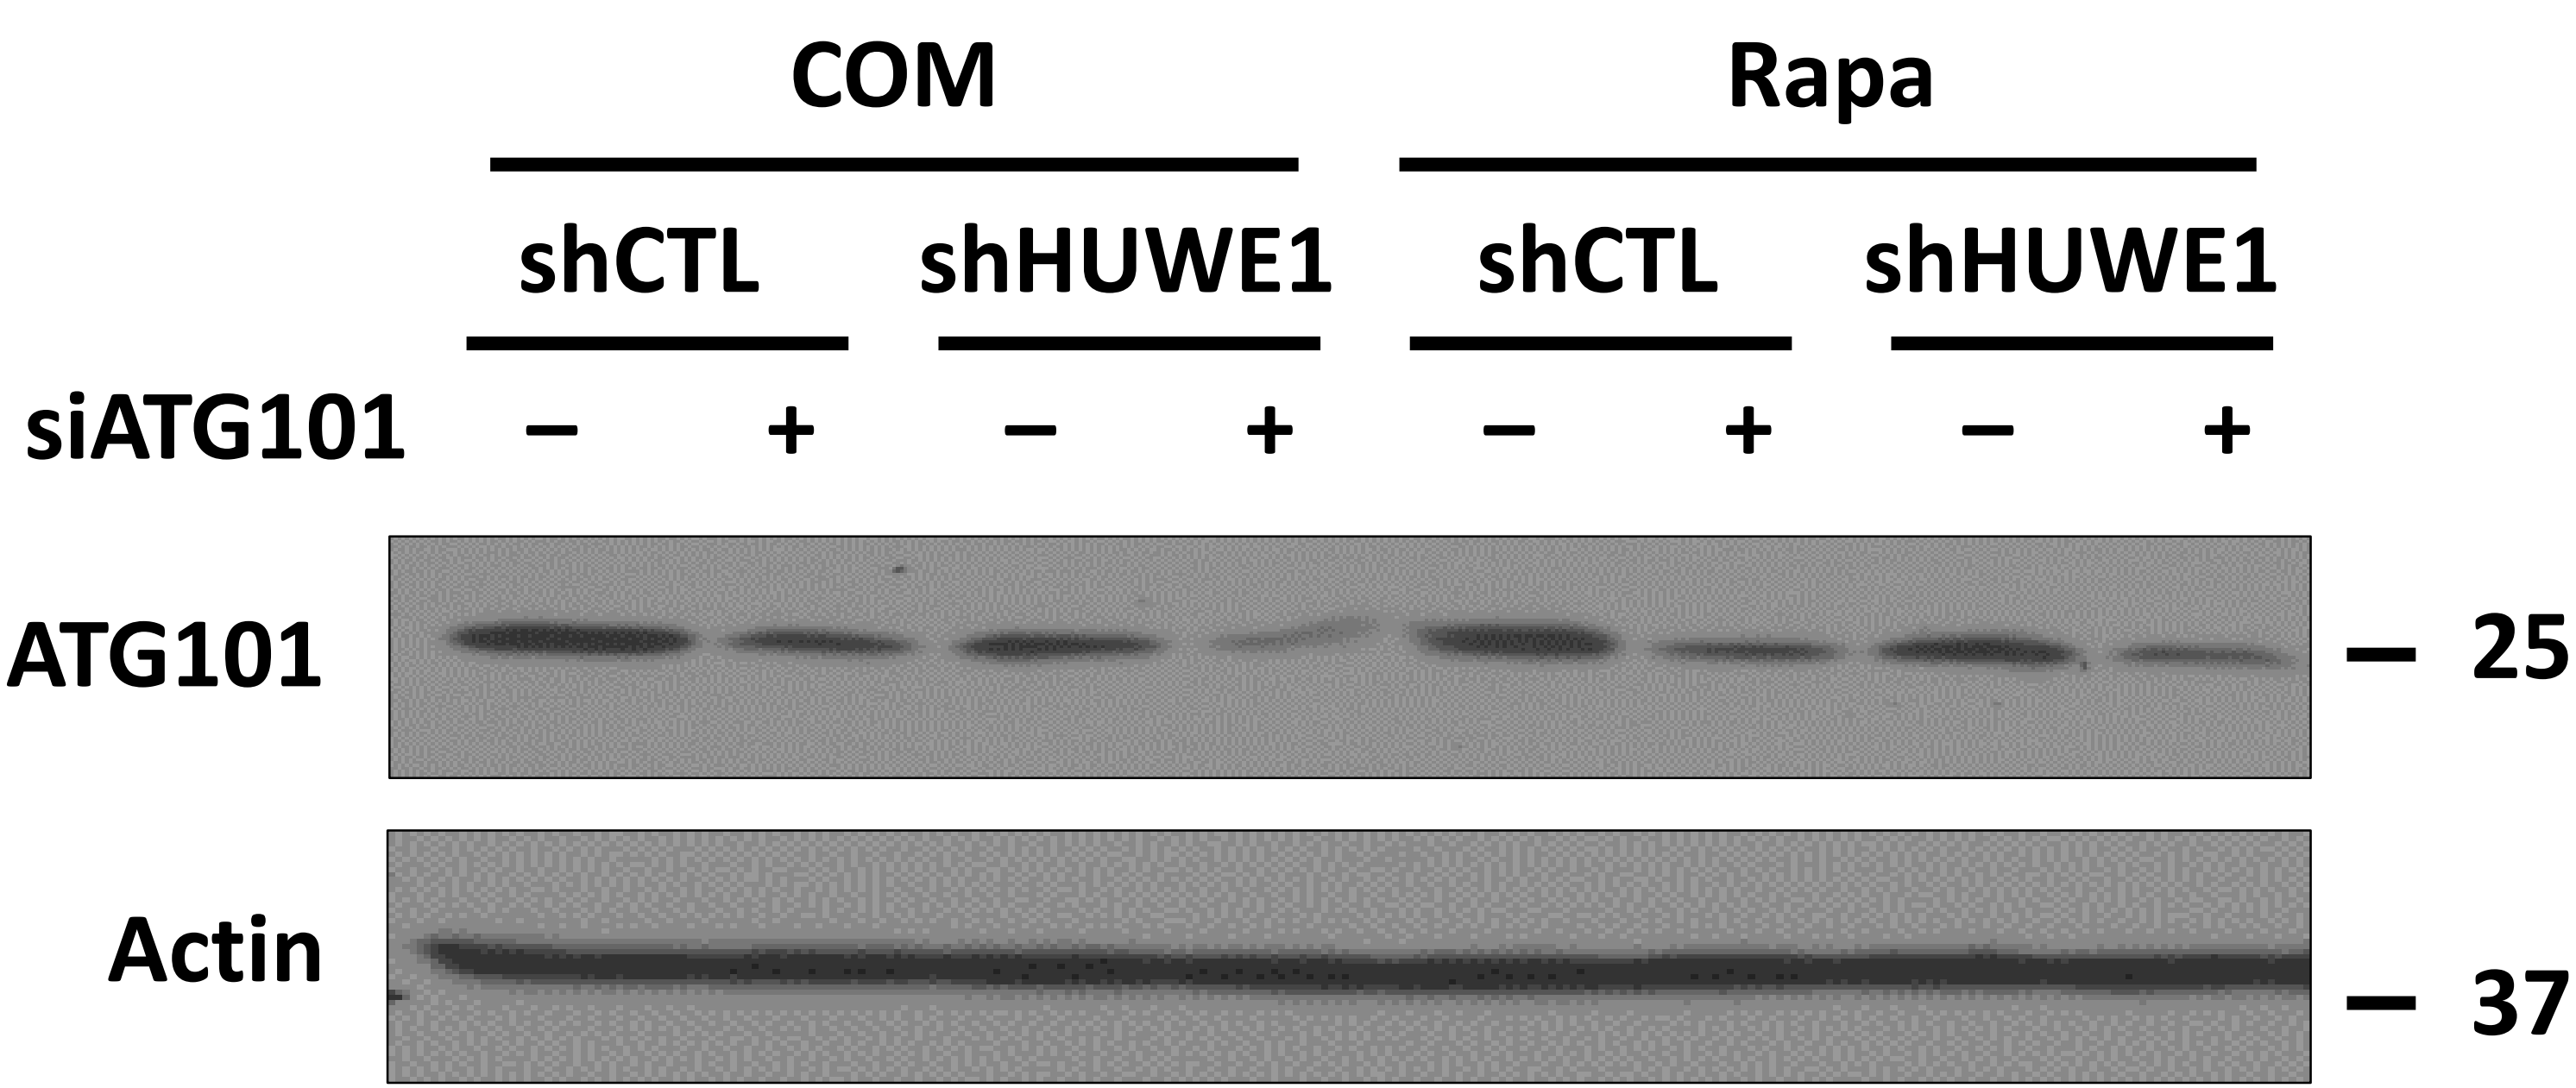

(a)

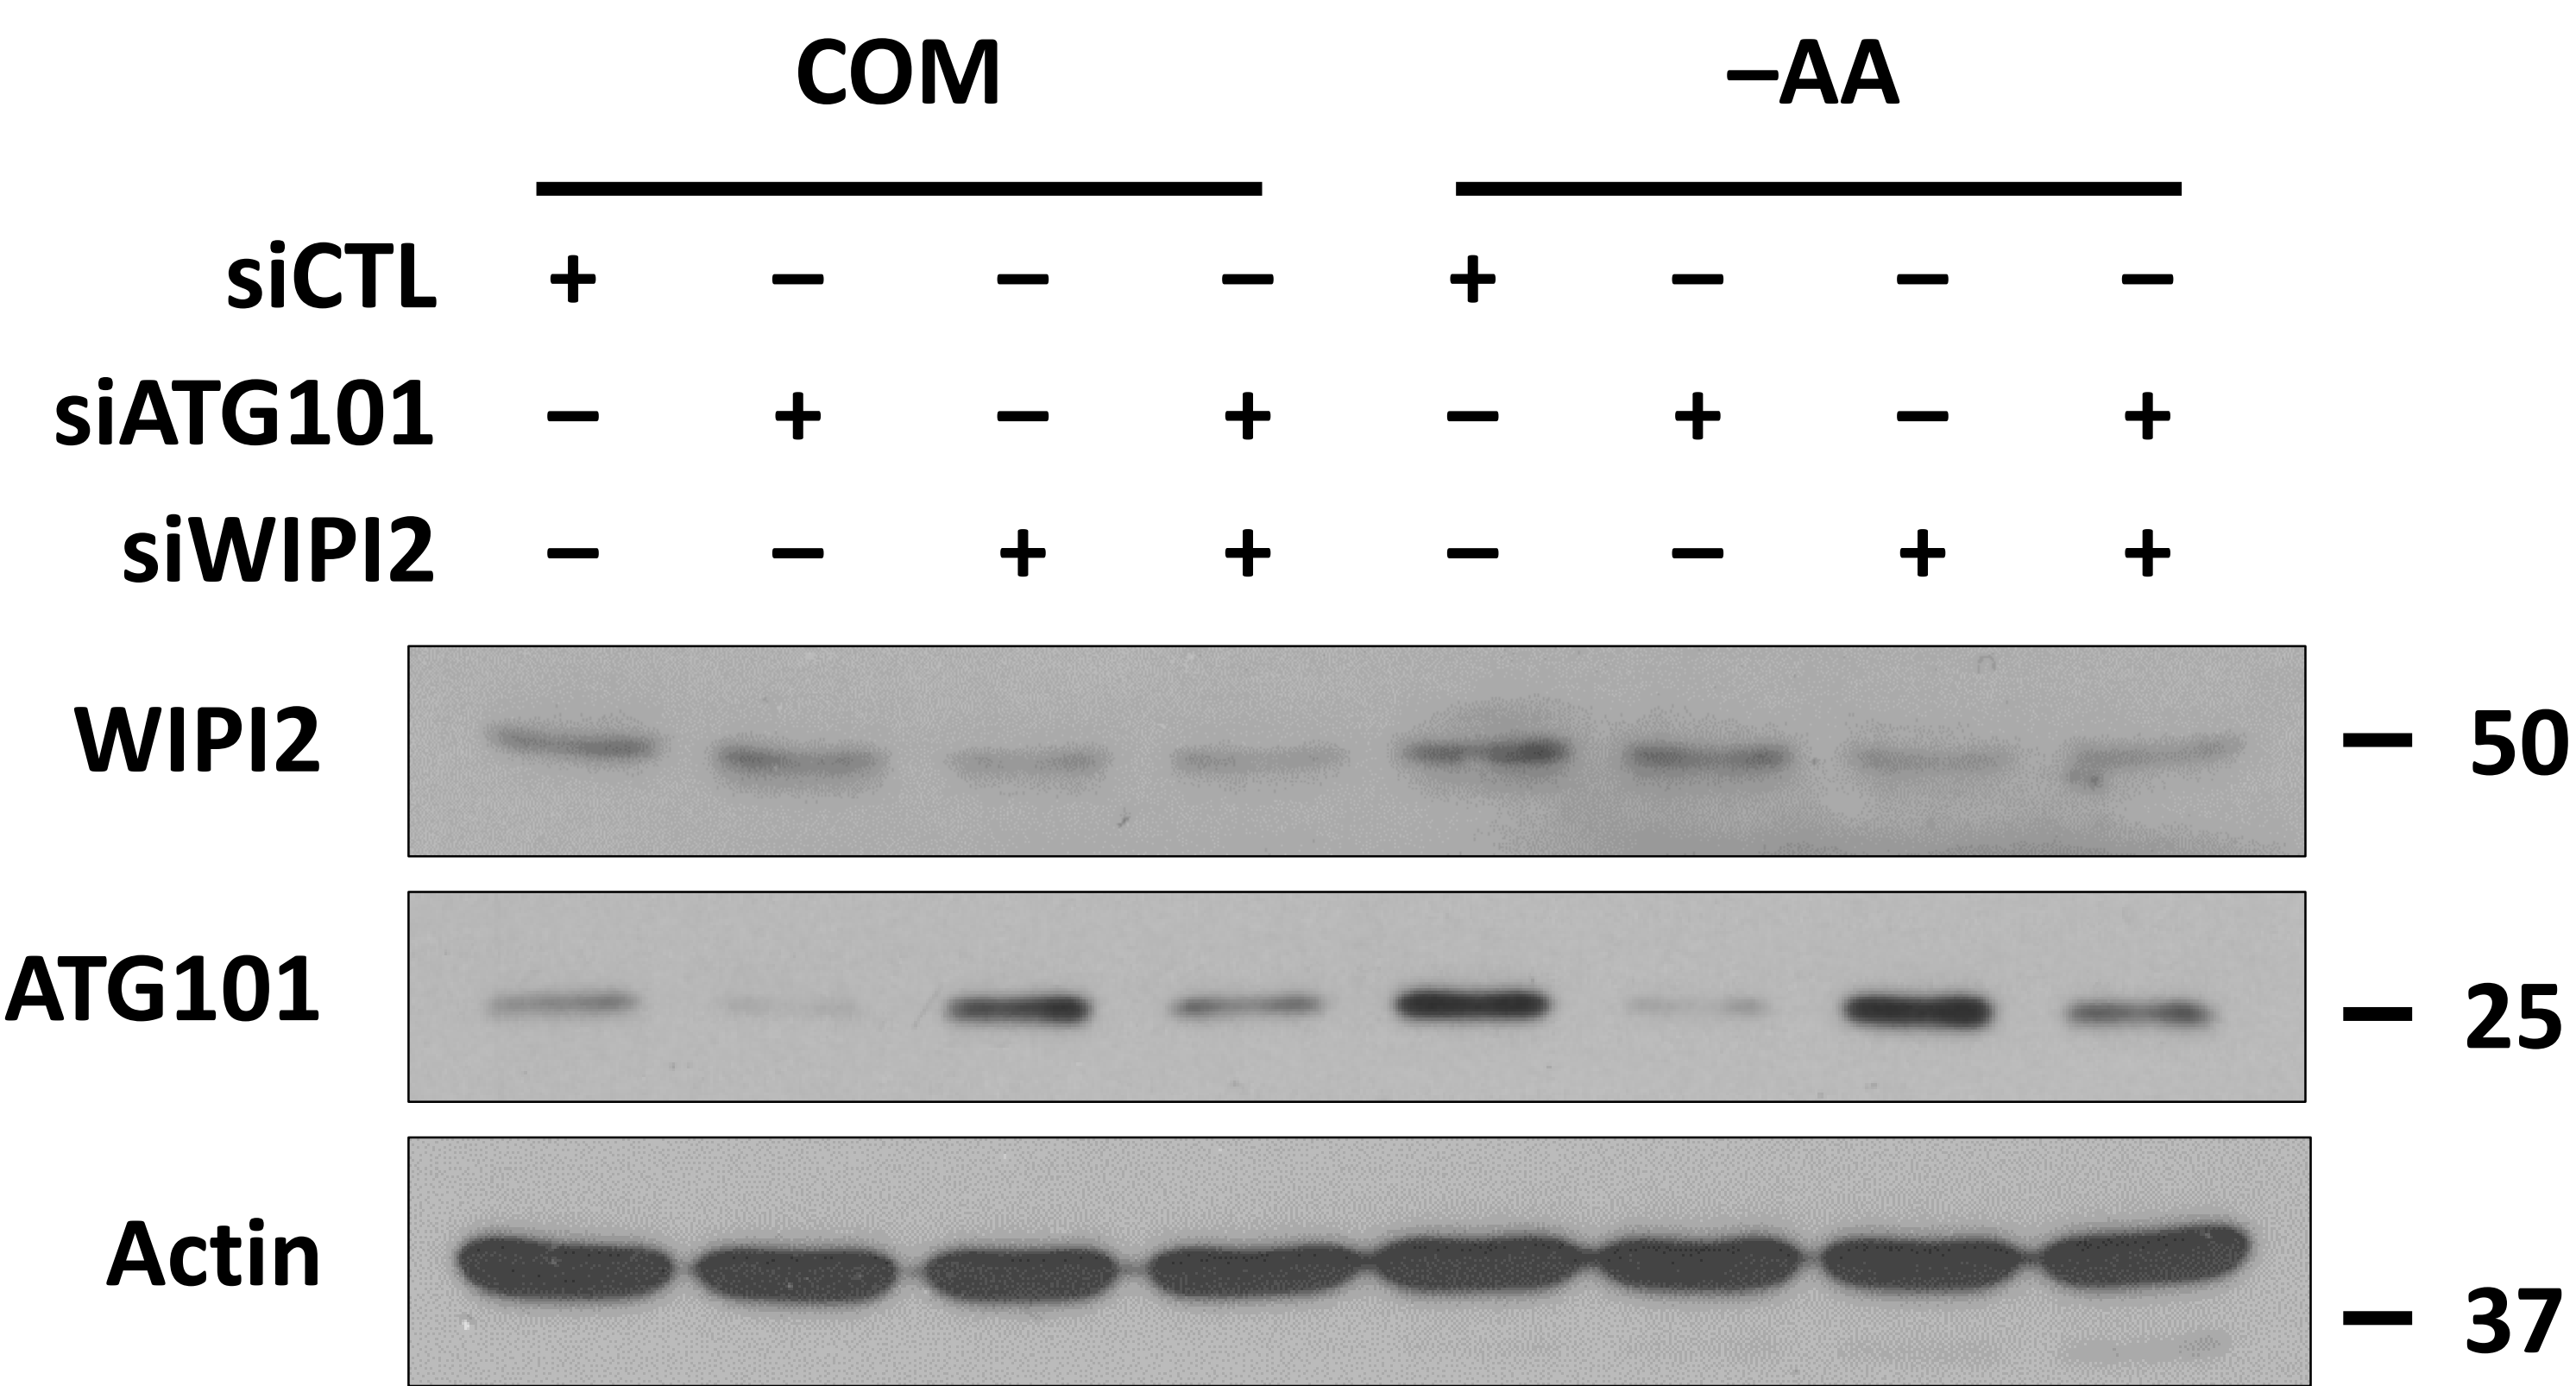

(b)

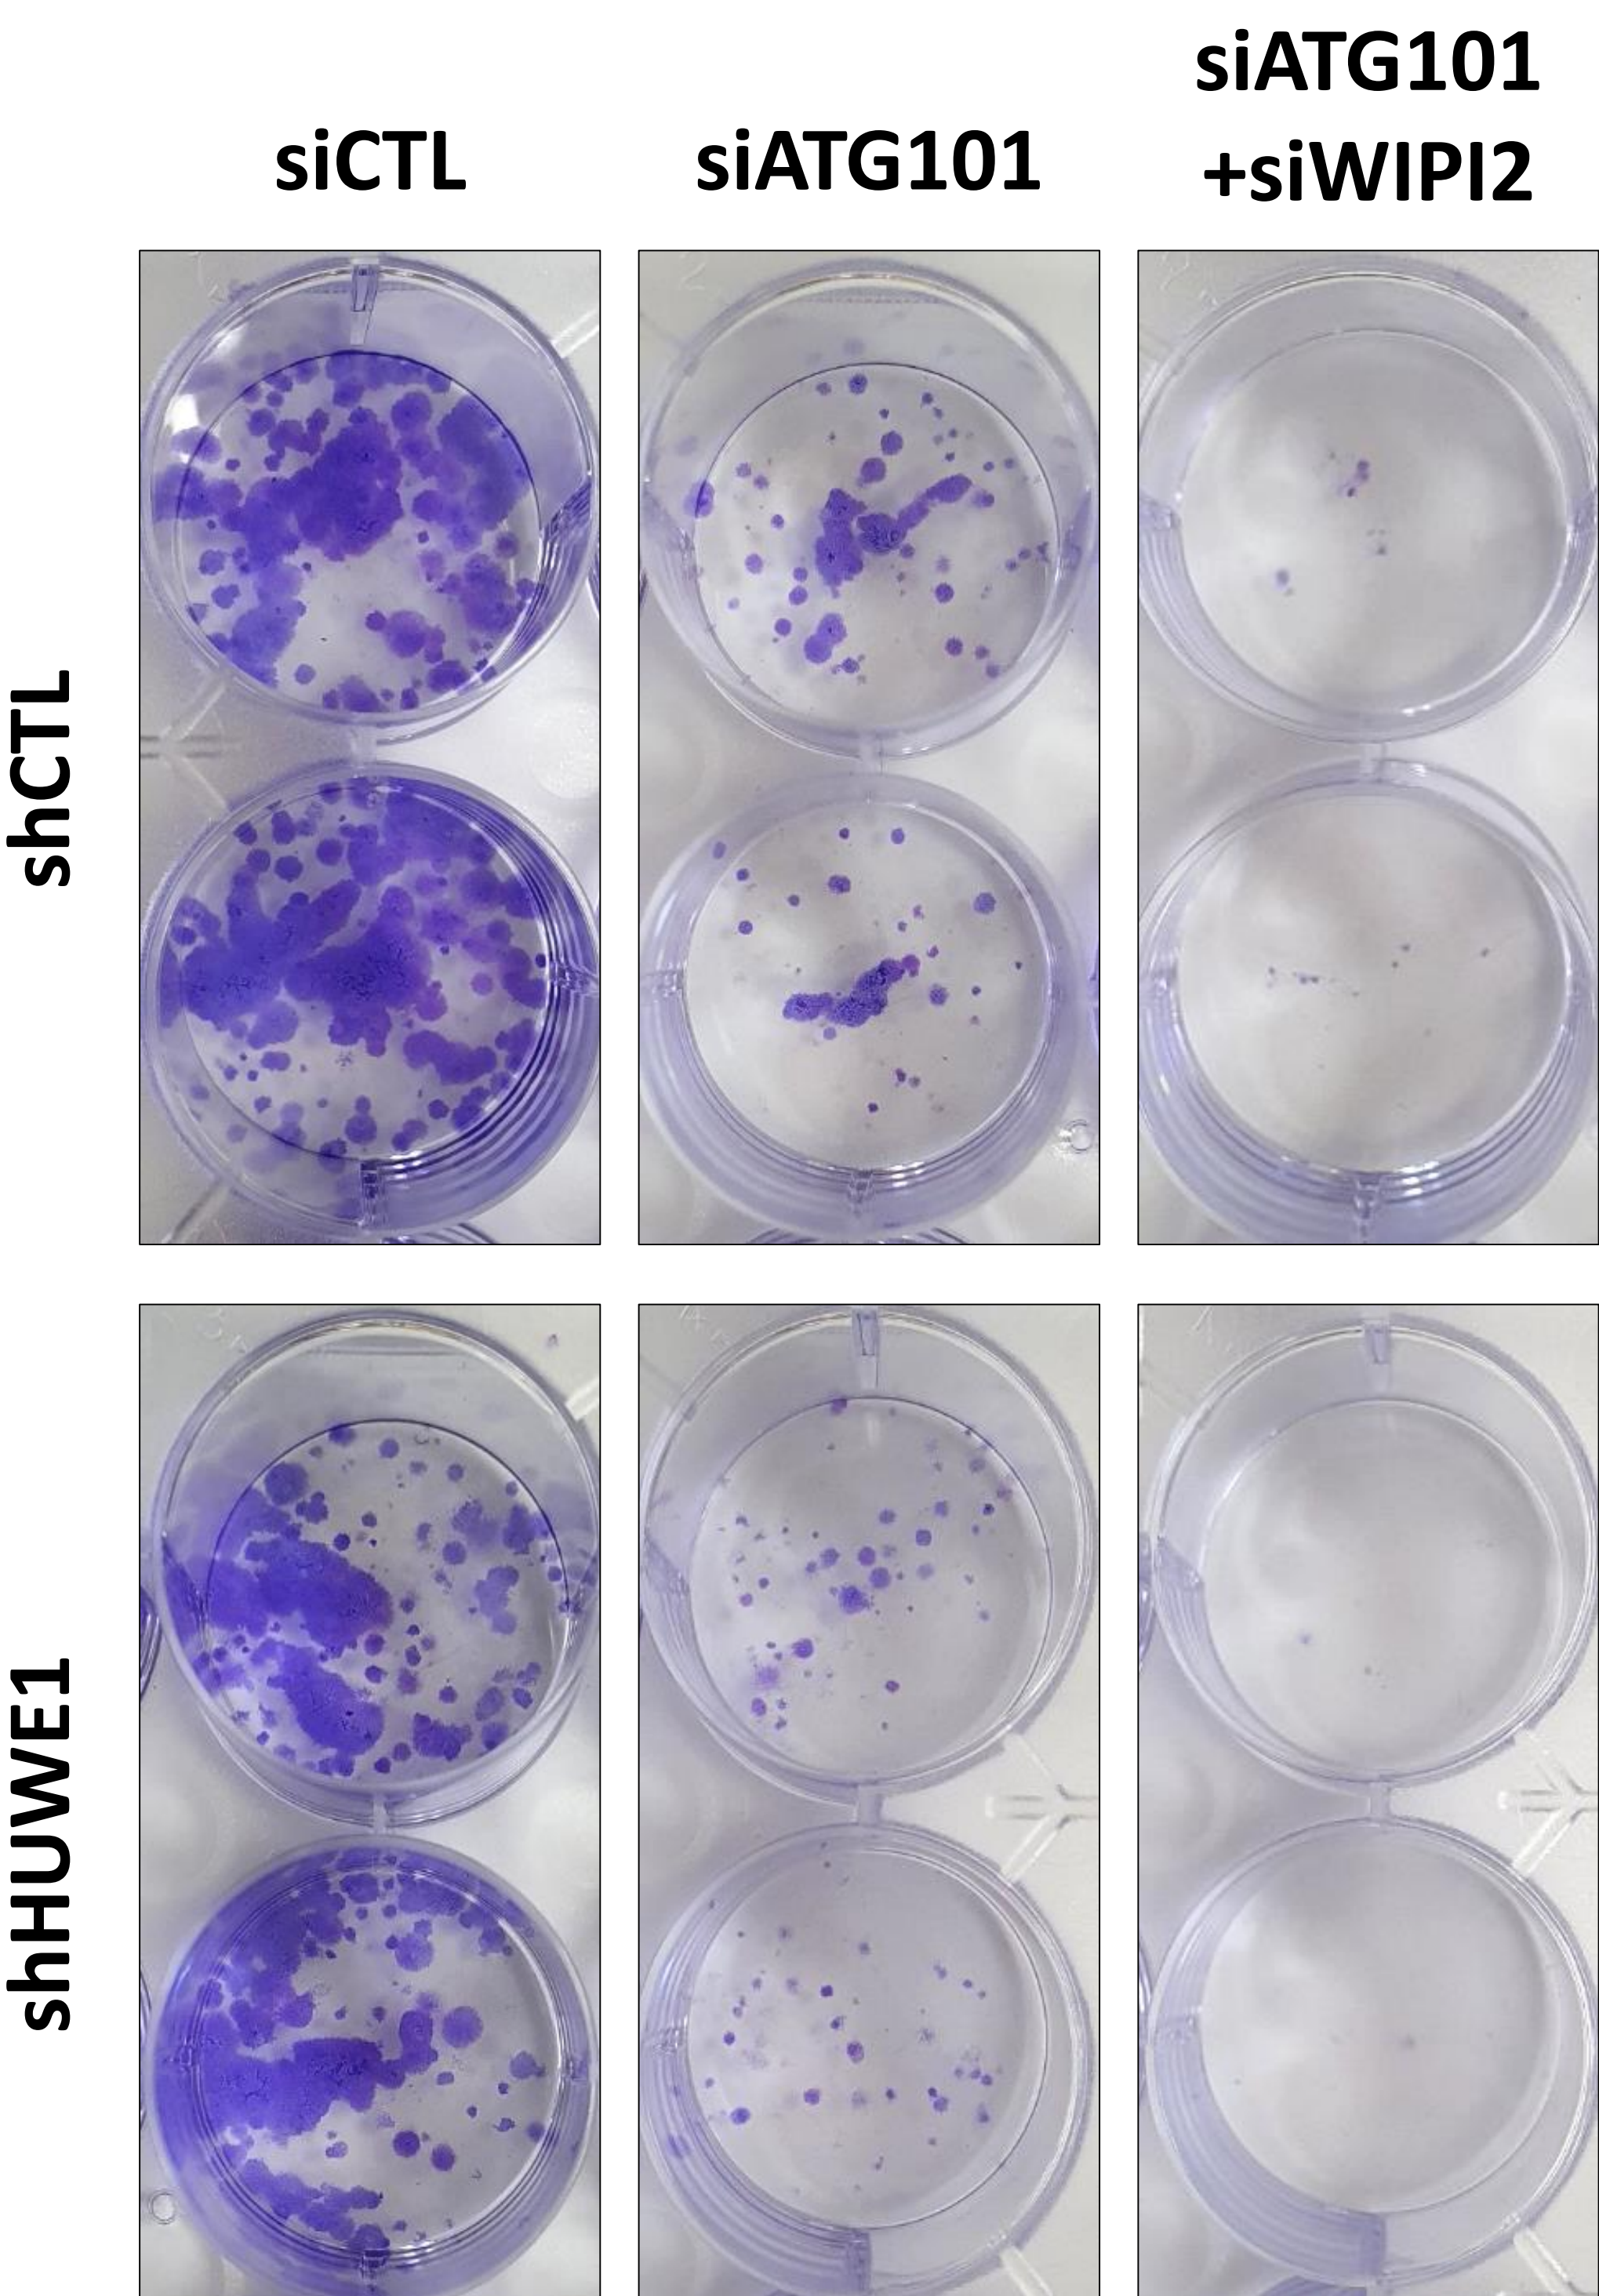

(c)

Supplement: s1 [file s1]

Supplementary Figure S2

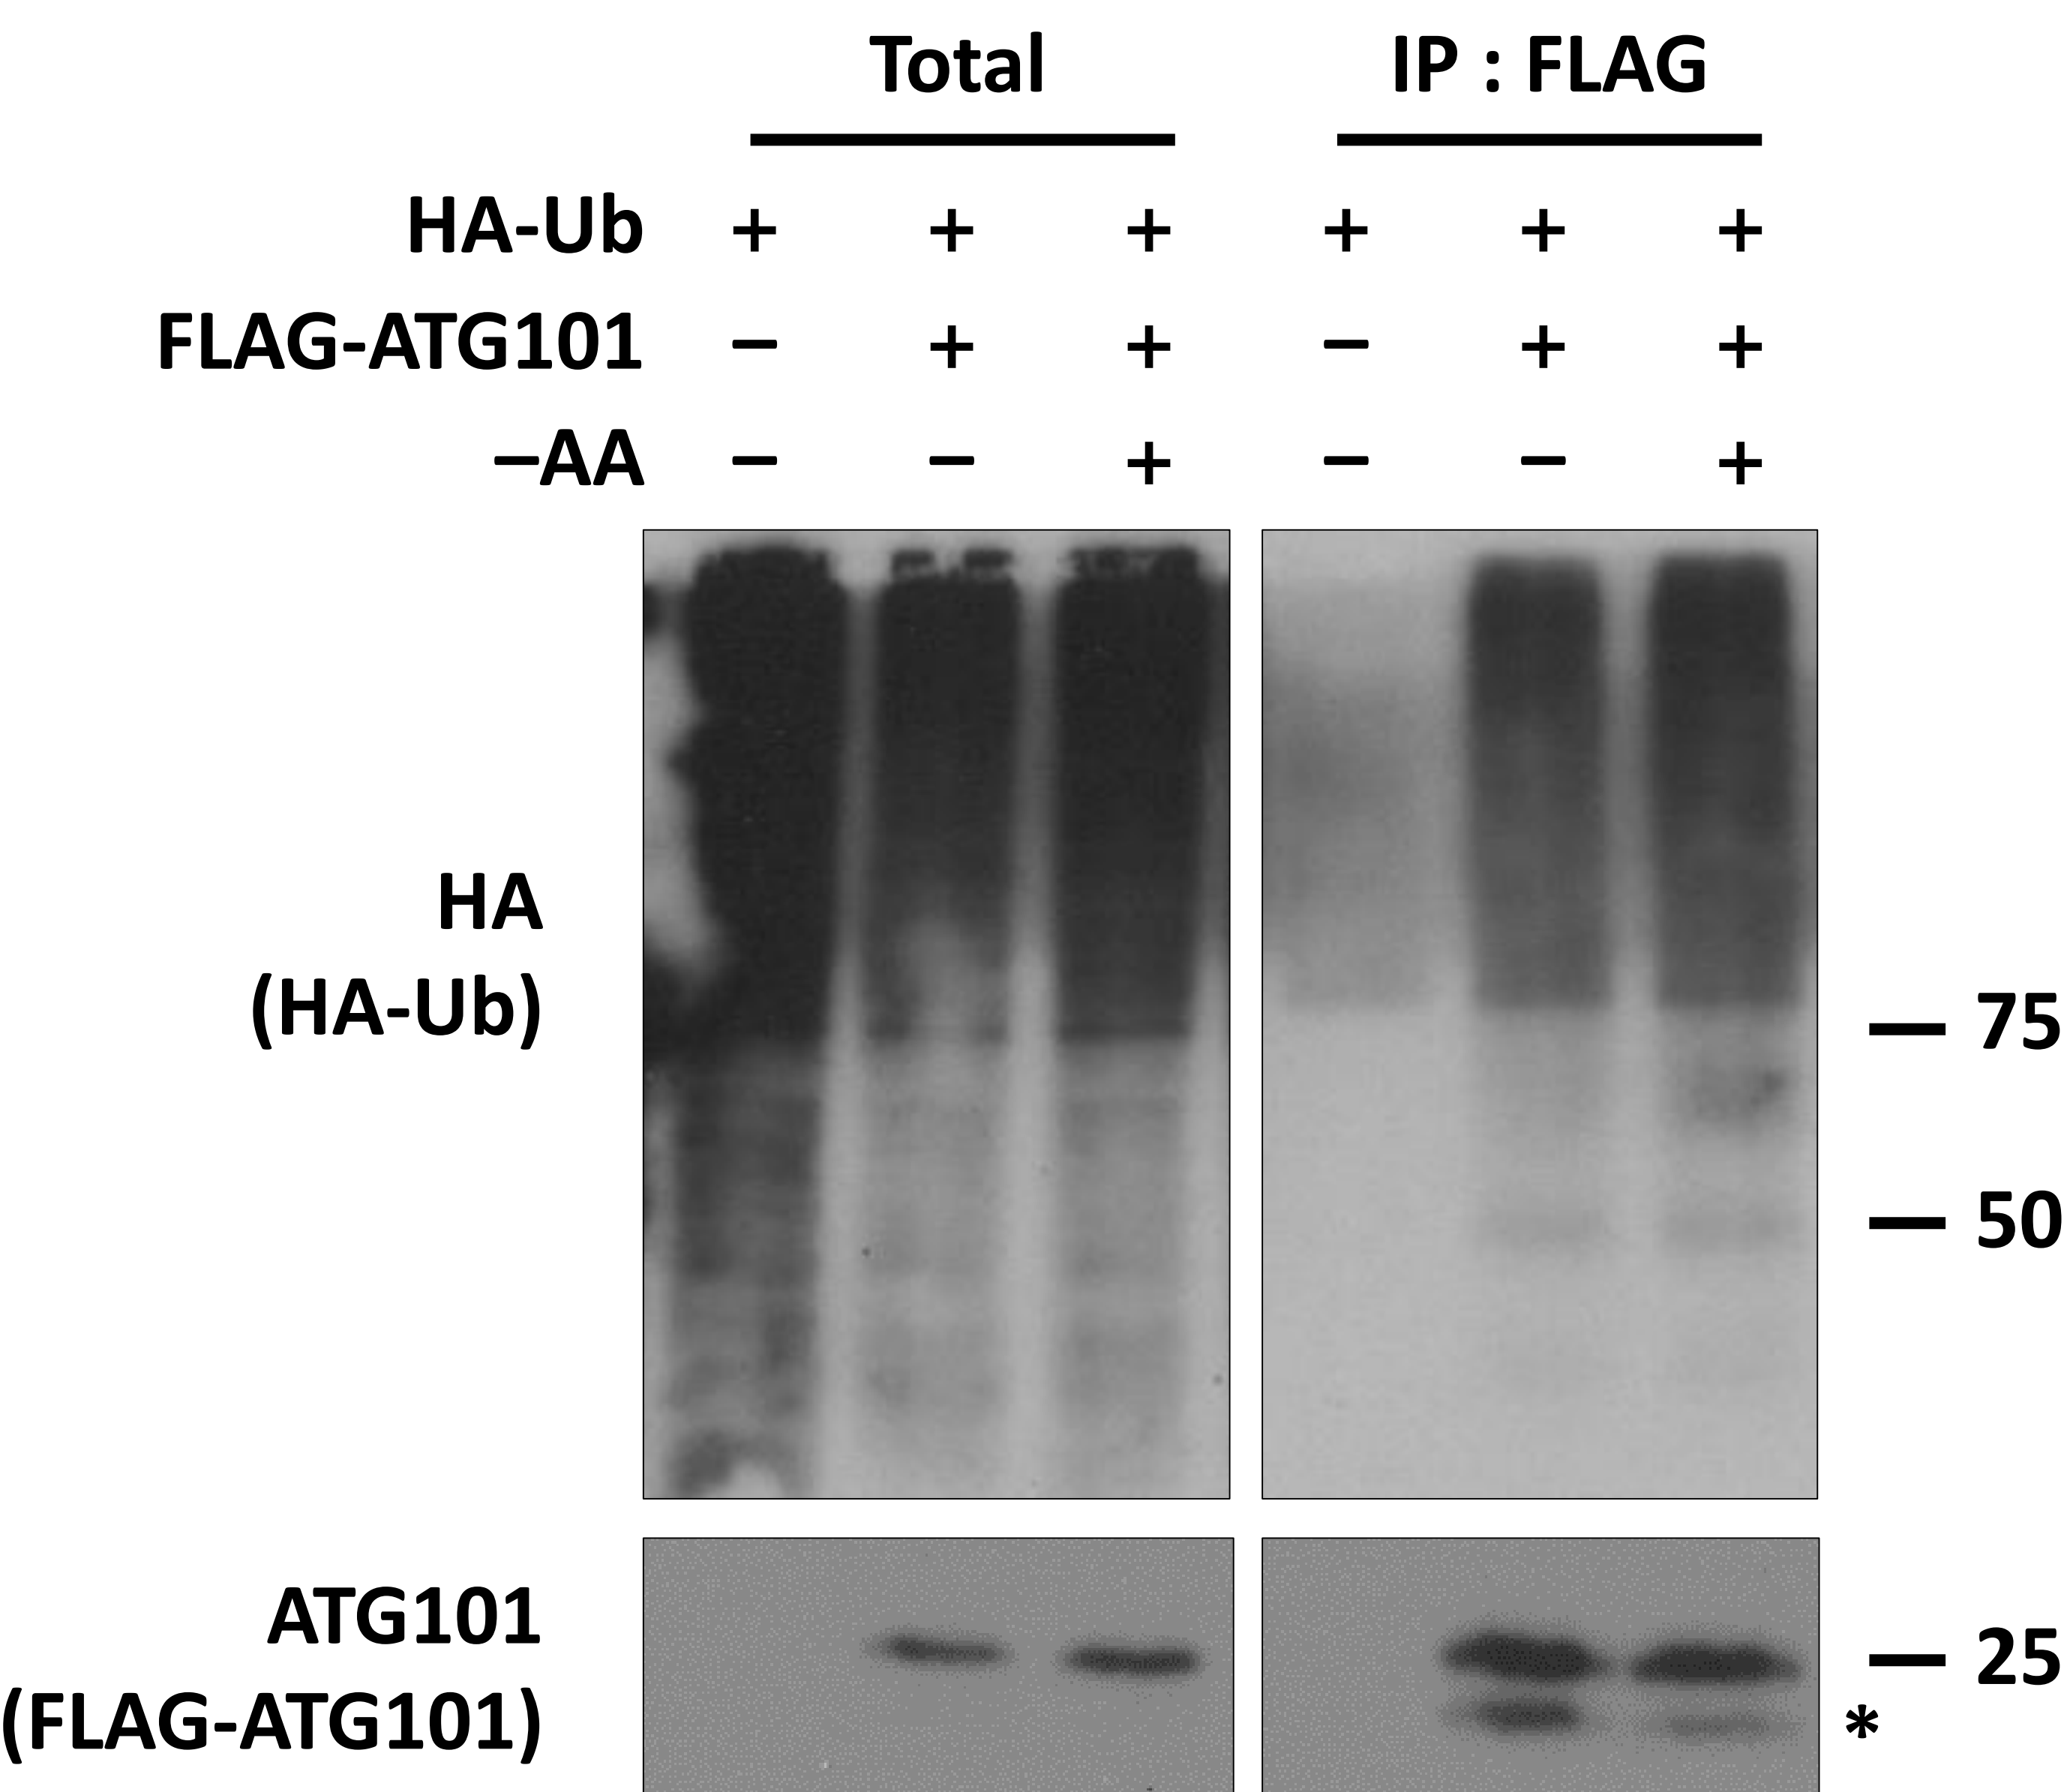

(a)

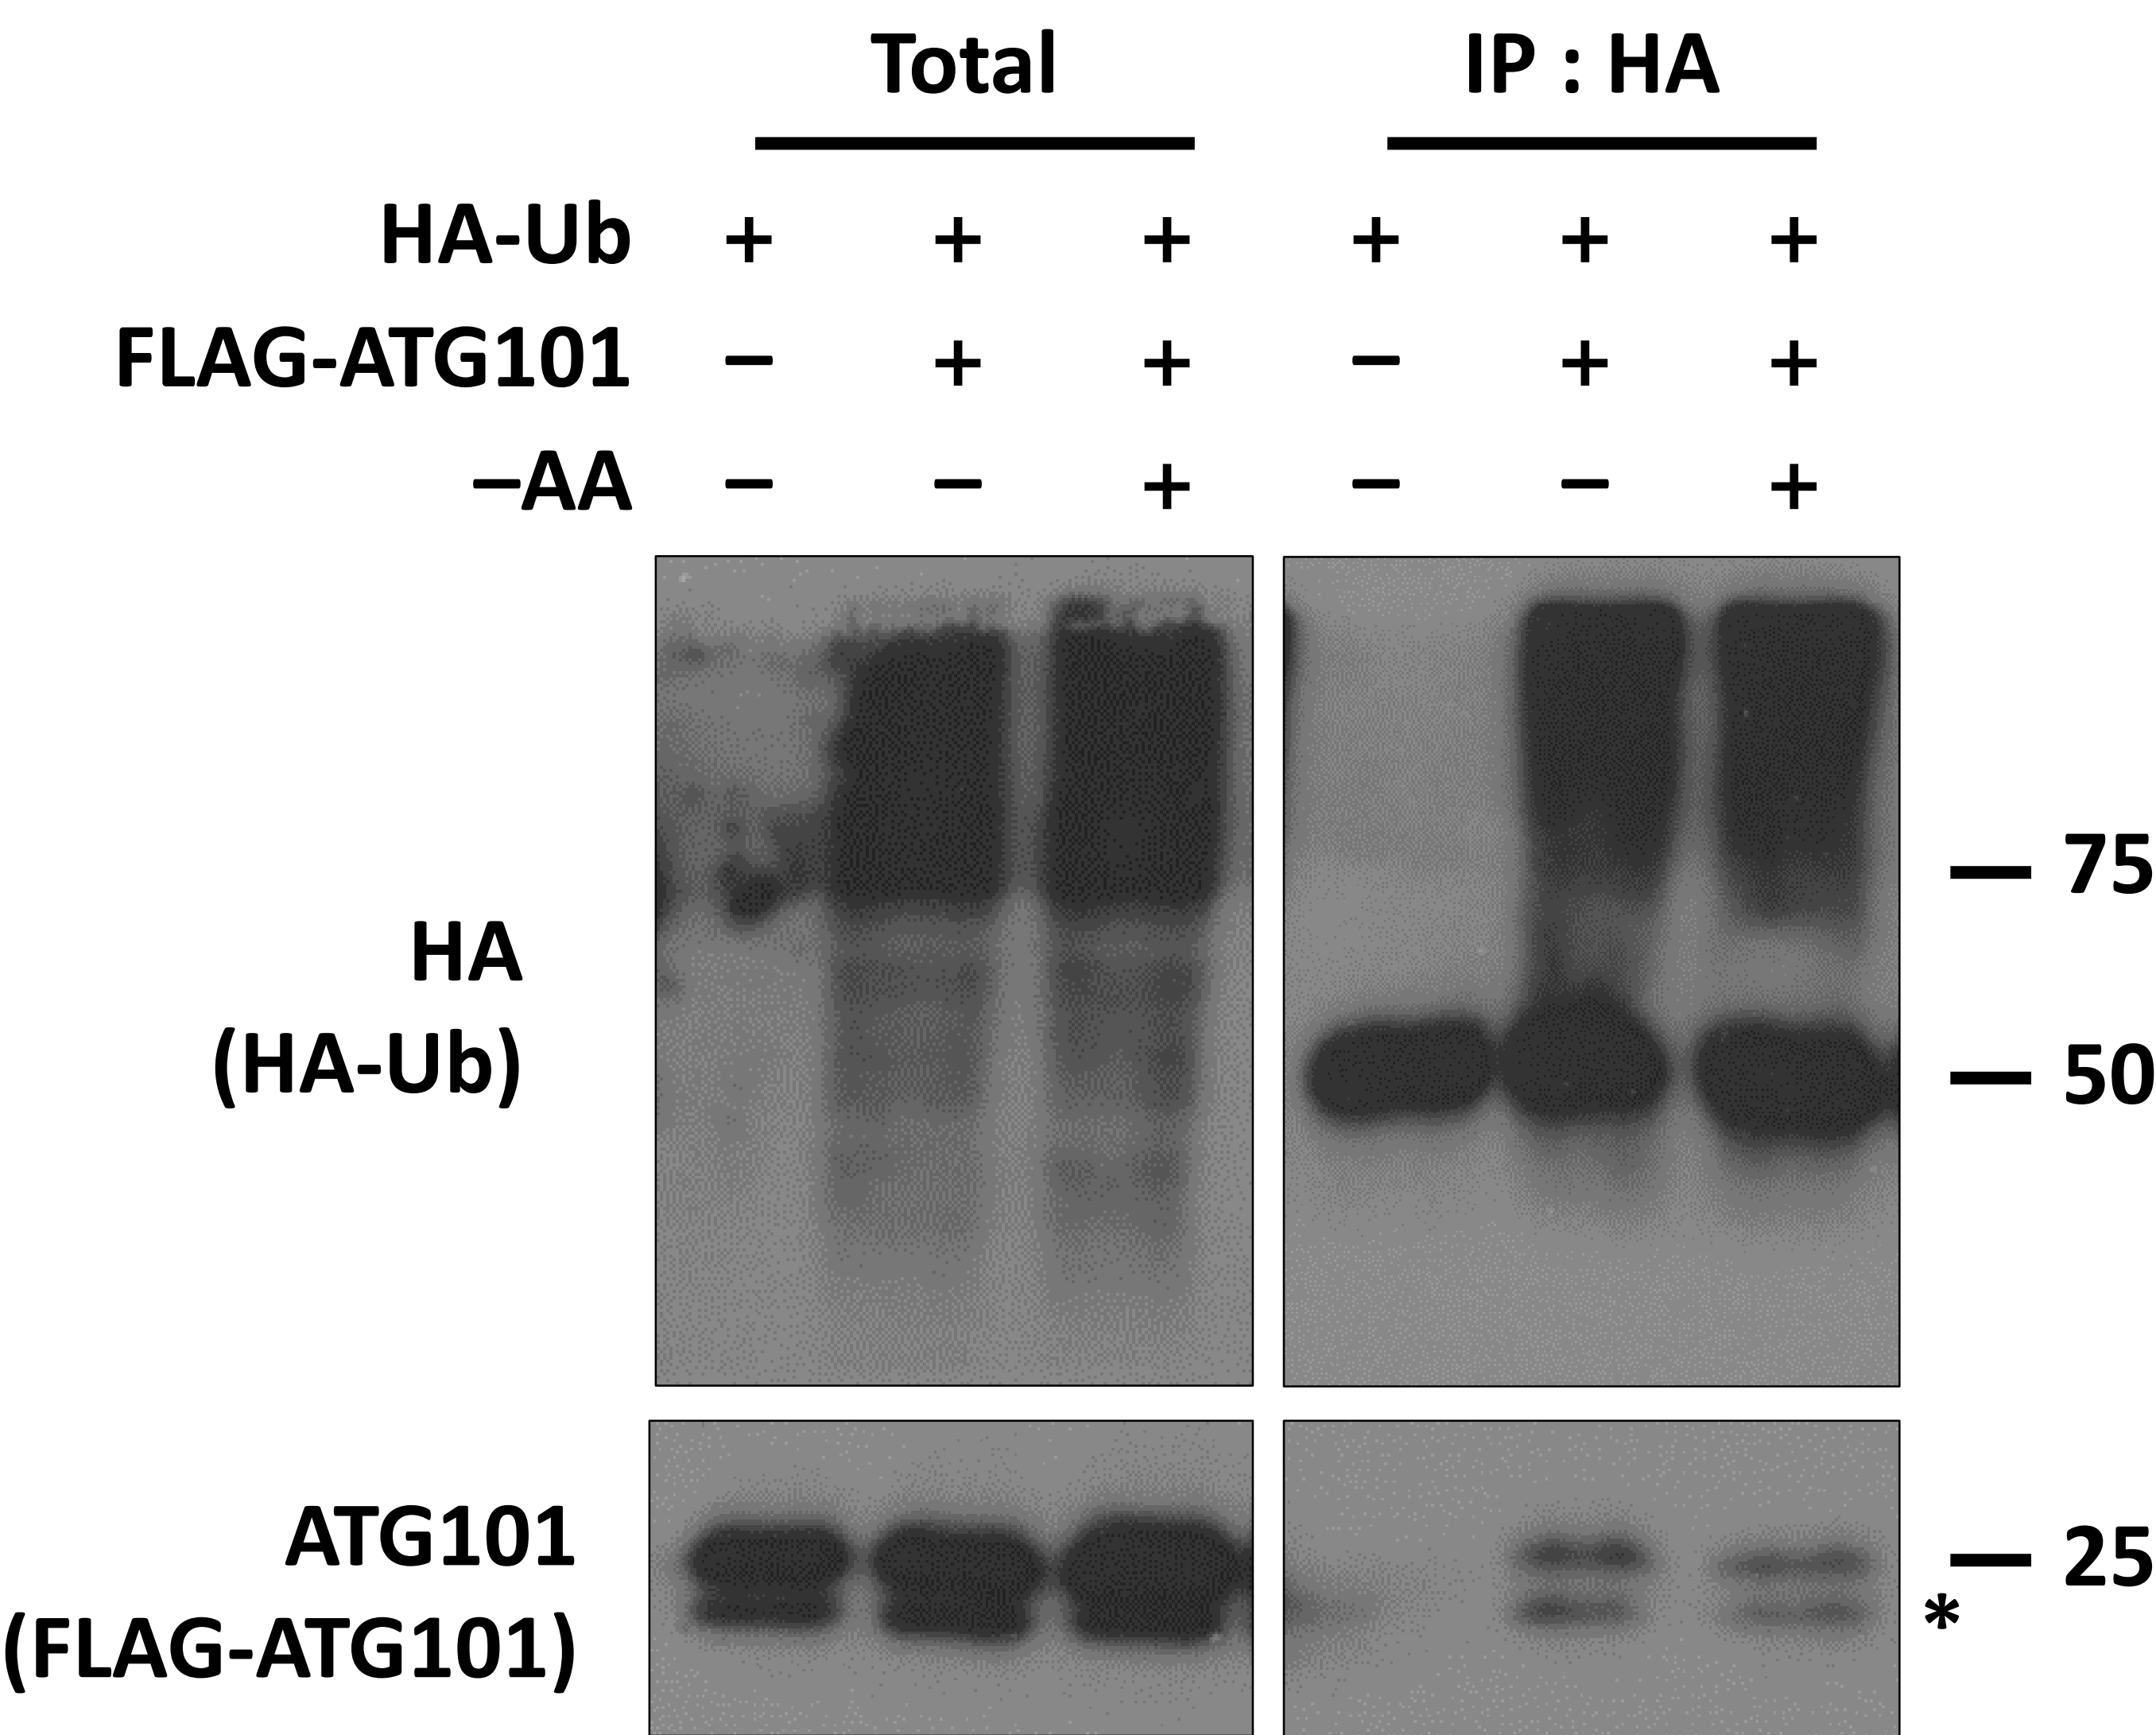

(b)

Supplement: s1 [file s1]

Supplementary Figure S3

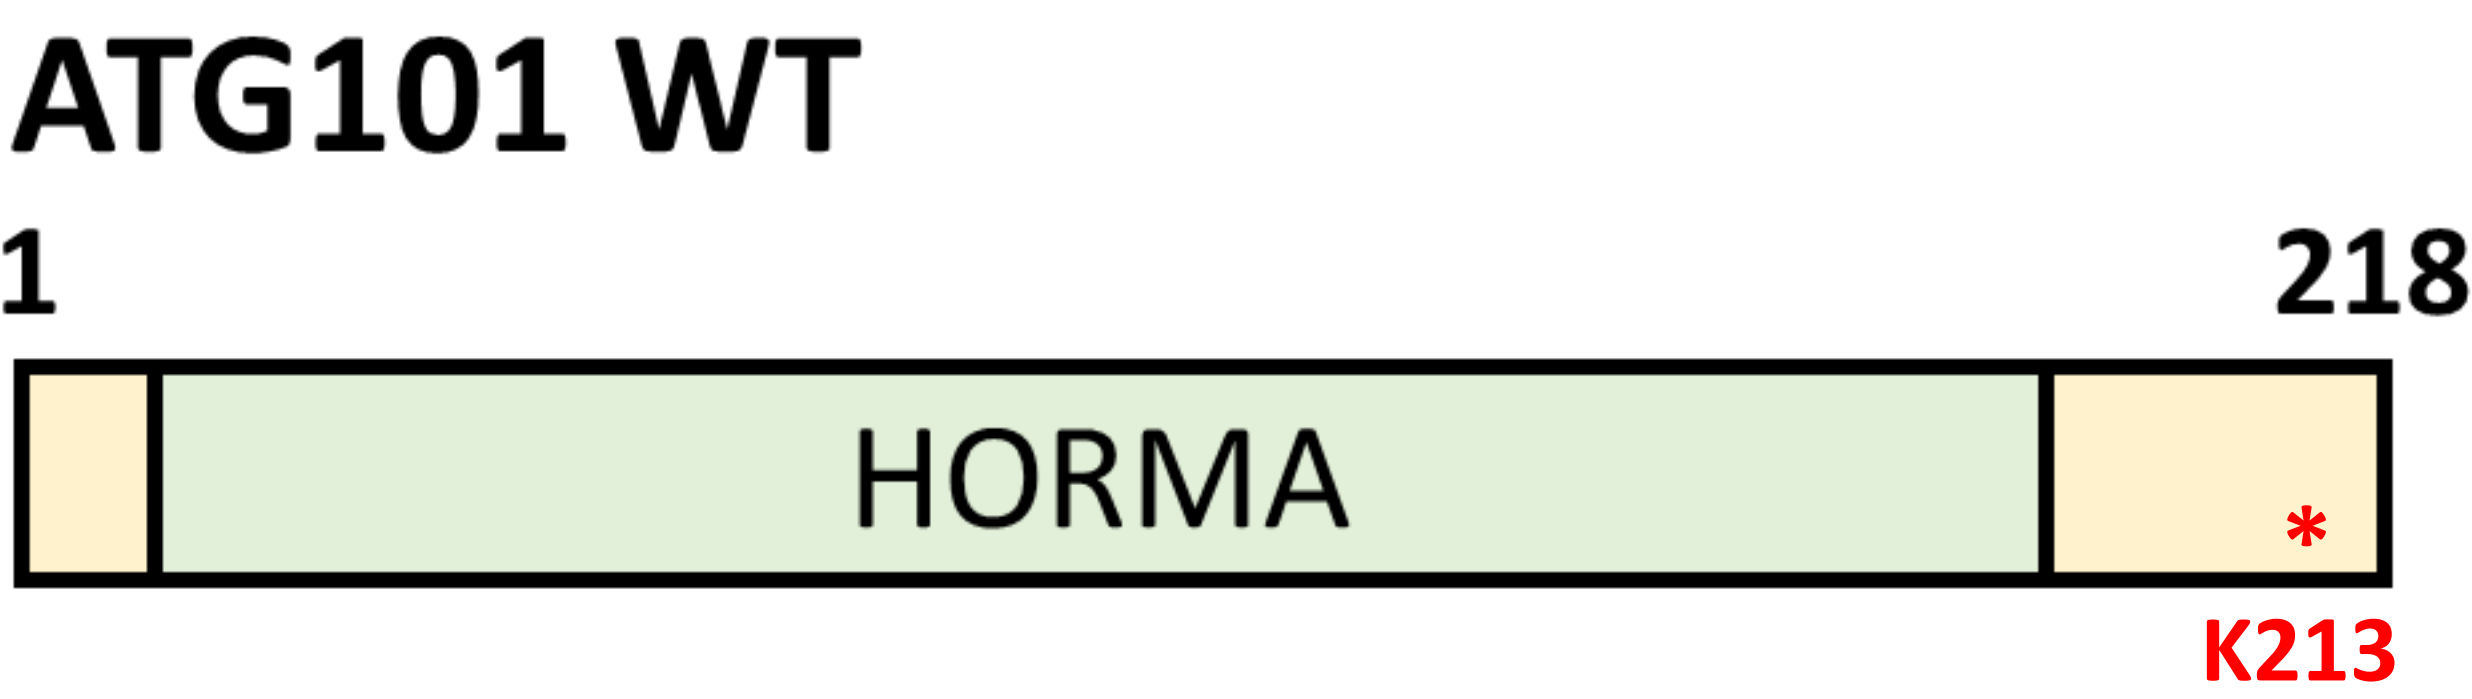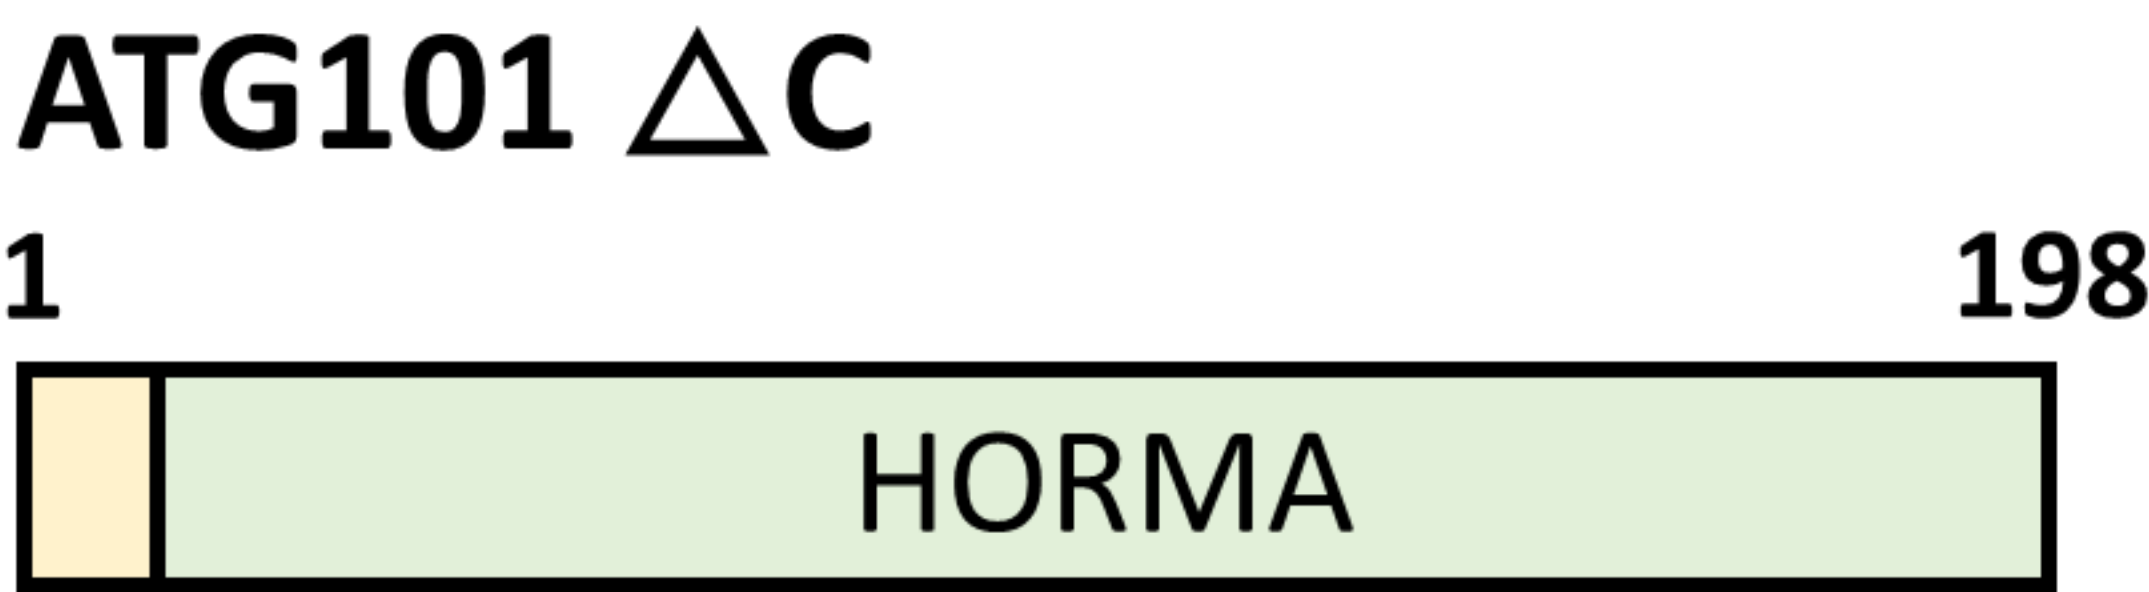

(a)

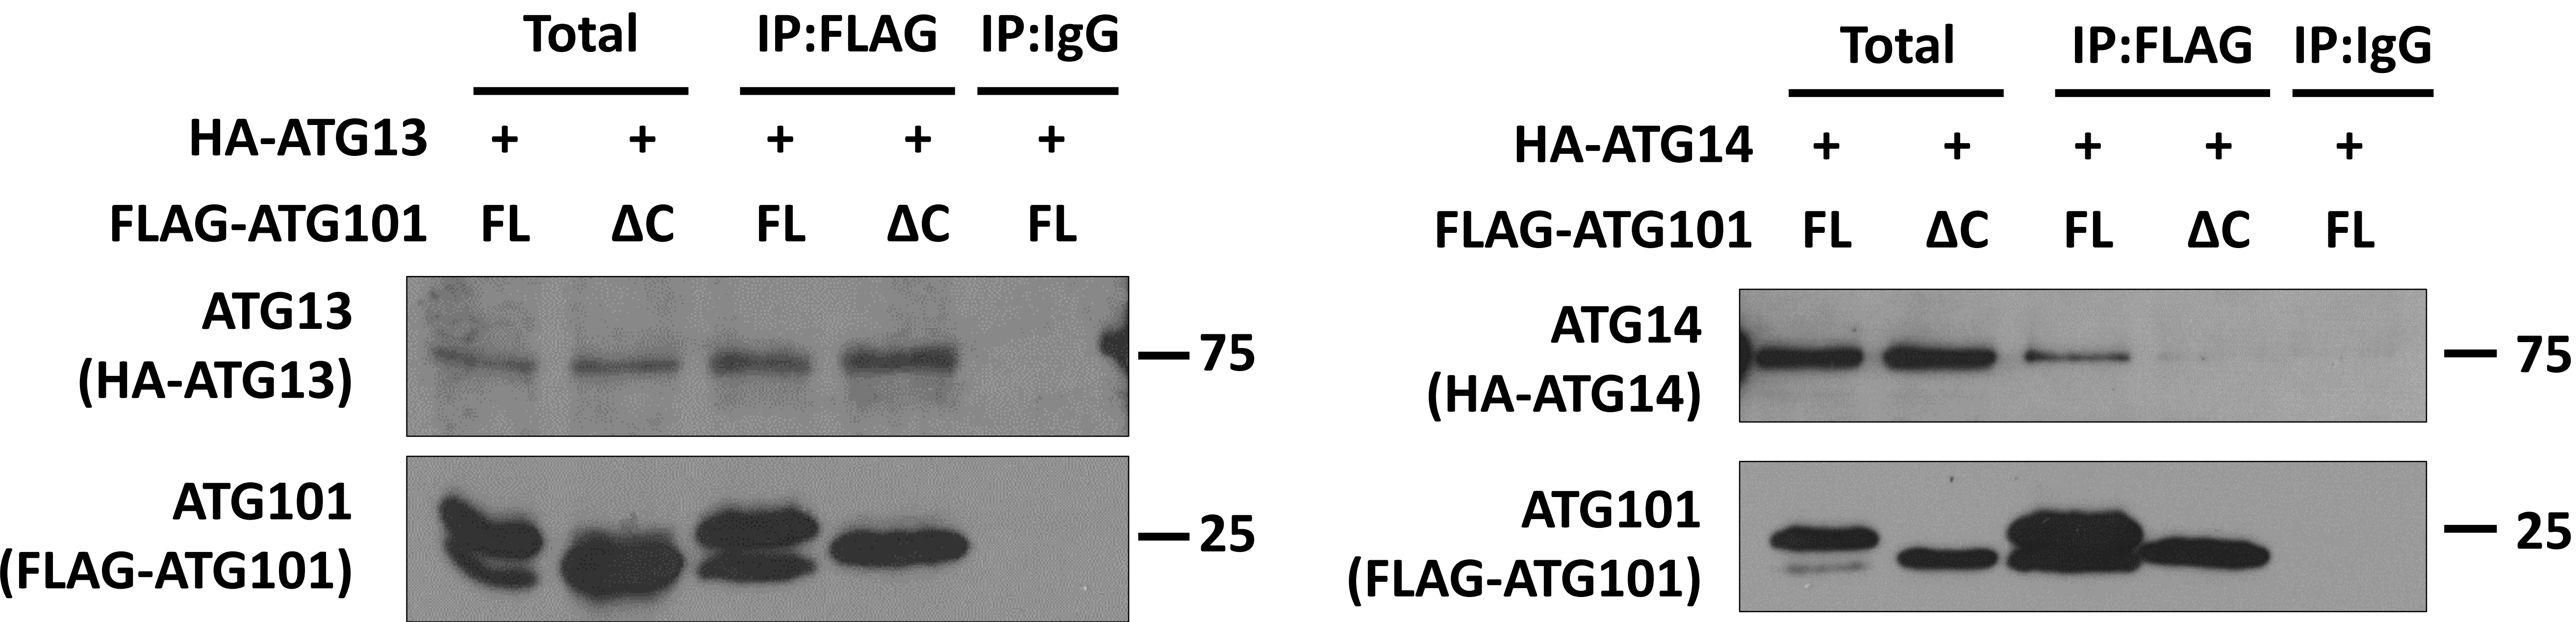

(b)

Supplement: s1 [file s1]
